# Supplementary material for: LINC00955 suppresses colorectal cancer growth by acting as a molecular scaffold of TRIM25 and Sp1 to Inhibit DNMT3B-mediated methylation of the PHIP promoter
Source: Springer Nature journal article supplement (doi:10.1186/s12885-023-11403-2), 2023-09-23
Supplement: MOESM1 [file 26080376]

Figuer2 C

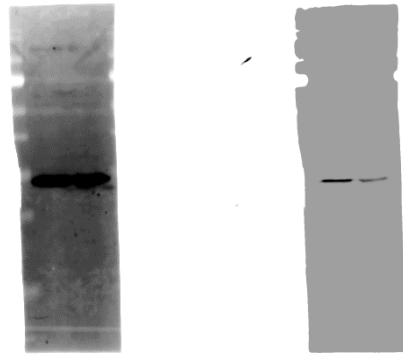

M3-HCT116-CDK2

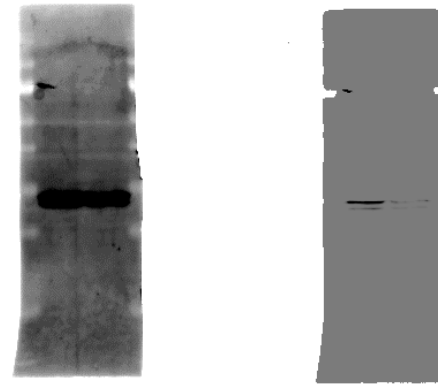

M2-RKO-CDK2

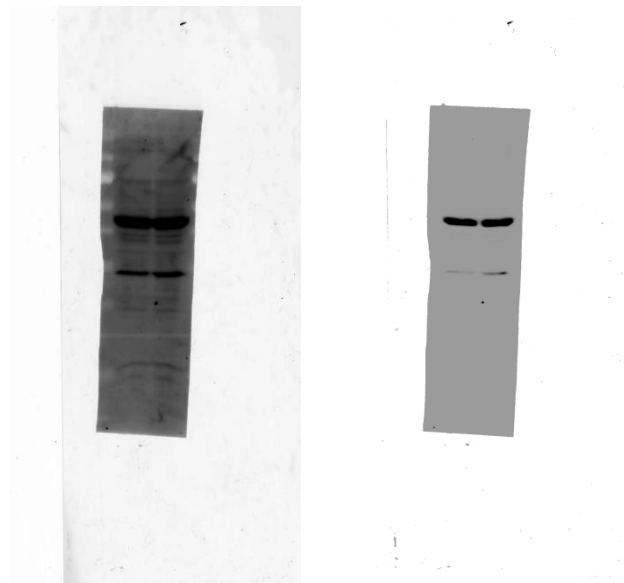

M3-HCT116-CYCLINE2

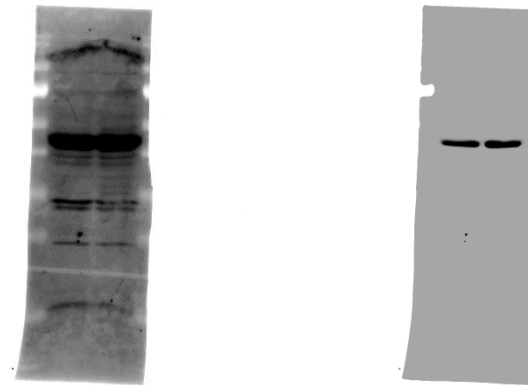

M2-RKO-CYCLINE2

Figuer2 C

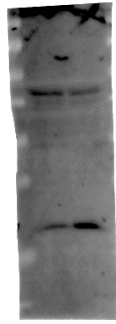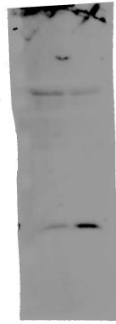

M3-HCT116-P21

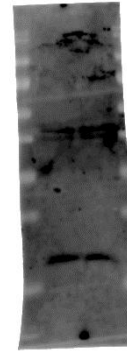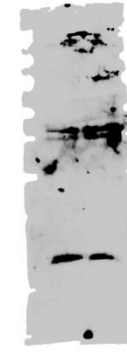

M2-RKO-P21

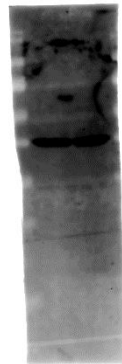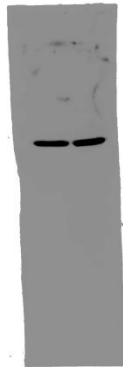

M3-HCT116-β-ACTION

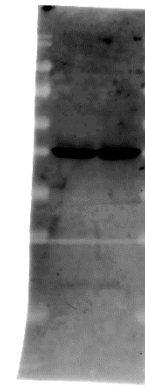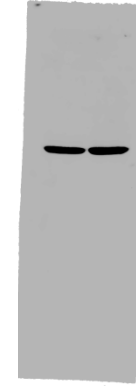

M2-RKO-β-ACTION

Figuer2 C

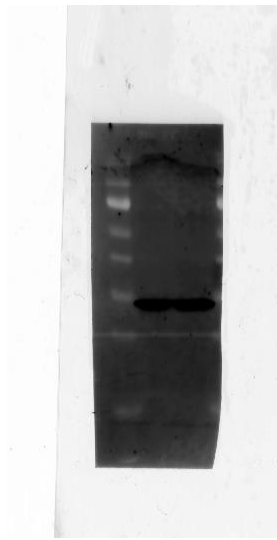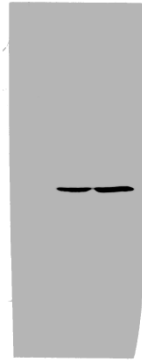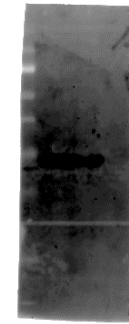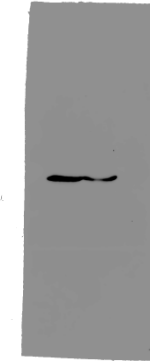

M1-HCT116-CDK4

M4-RKO-CDK4

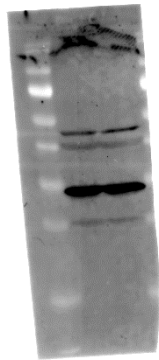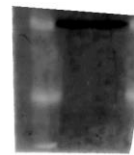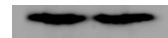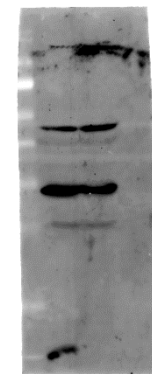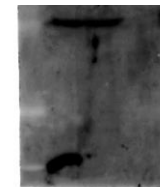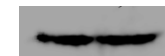

M1-HCT116-P27

M4-RKO-P27

Figuer2 C

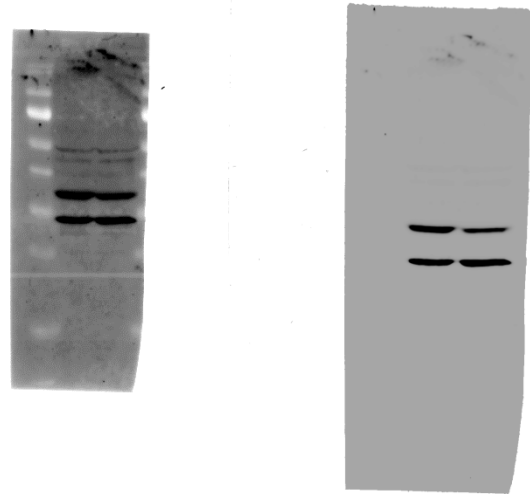

M1-HCT116-CDK6

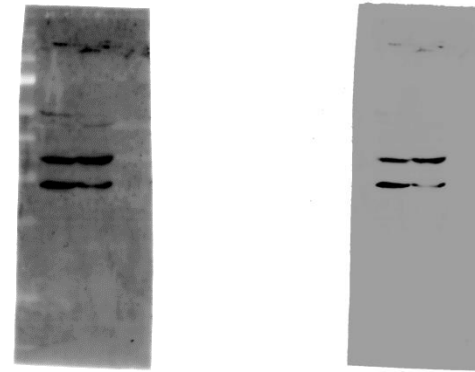

M4-RKO-CDK6

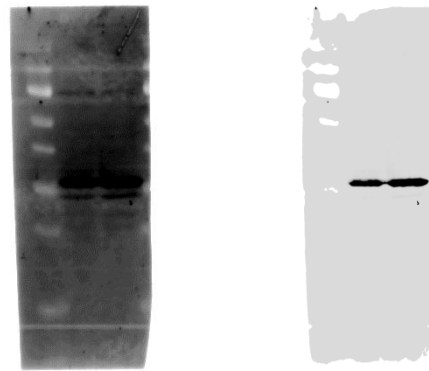

M1-HCT116-CYCLIND1

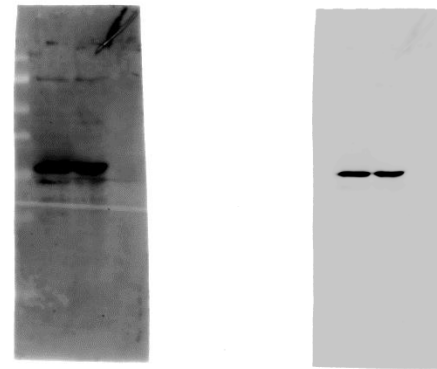

M4-RKO-CYCLIND1

Figuer2 C

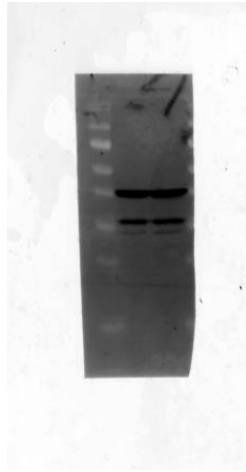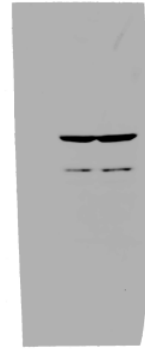

M1-HCT116- $\beta$ -ACTION

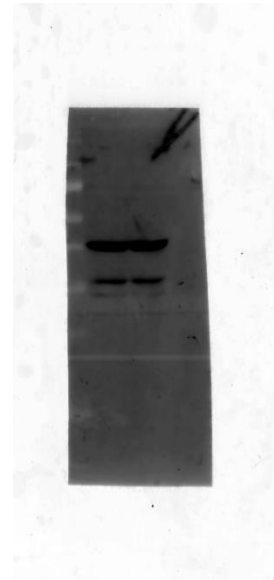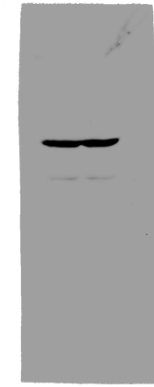

M4-RKO- $\beta$ -ACTION

Figuer2 D

HCT116(linc00955)-vector/CDK2

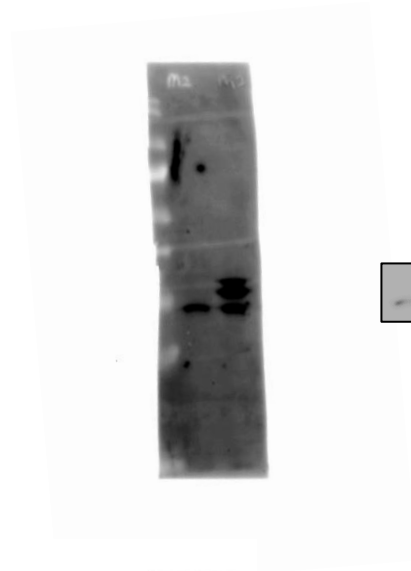

 CDK2

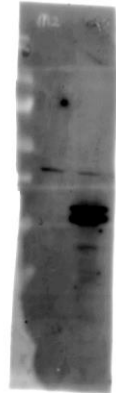

 HA

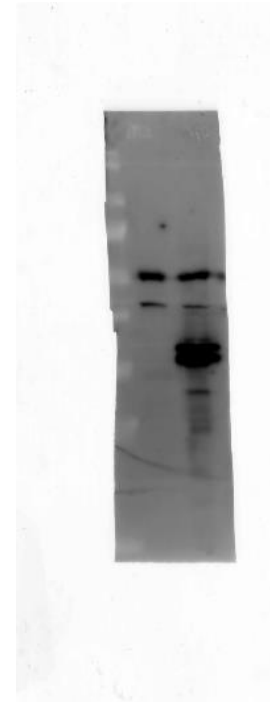

 TUBULIN

Figuer2 E

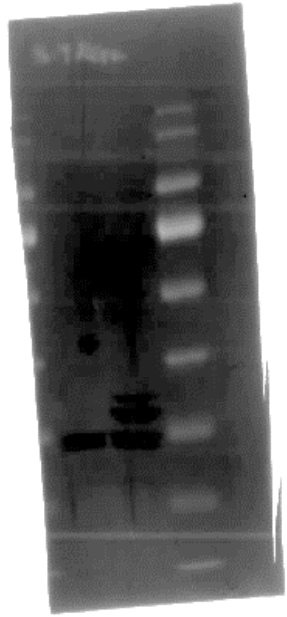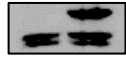

CDK2

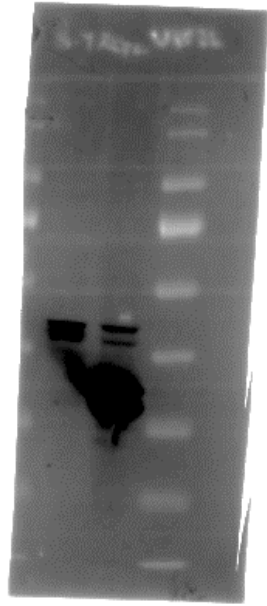

ha

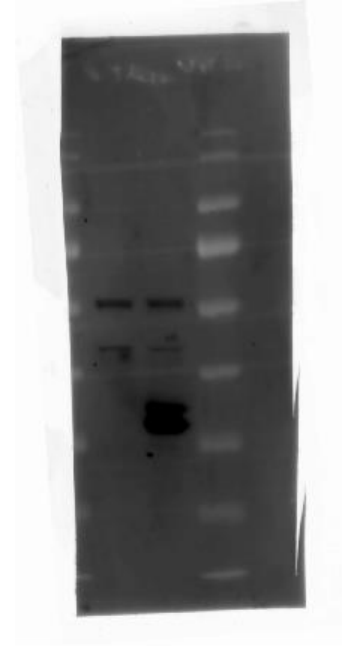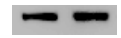

tublin

Figuer3 B

HCT116细胞CDK2降解速率

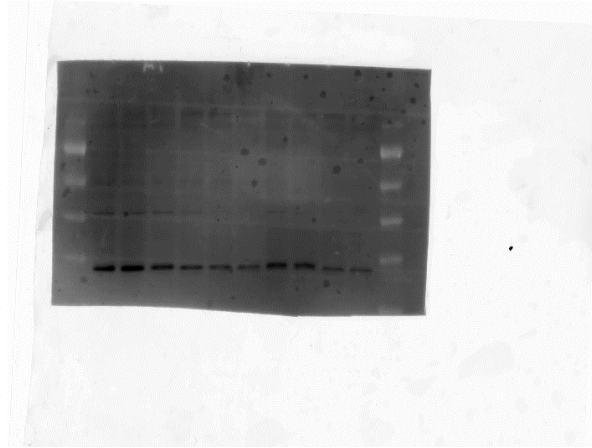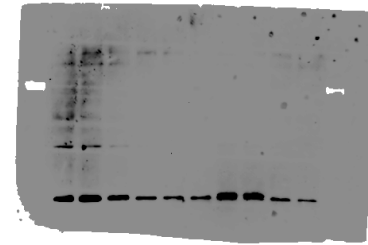

CDK2

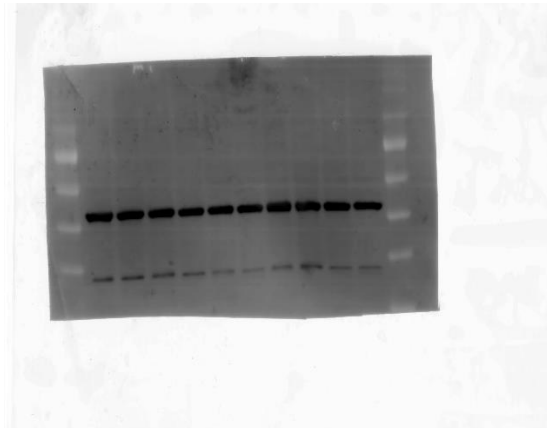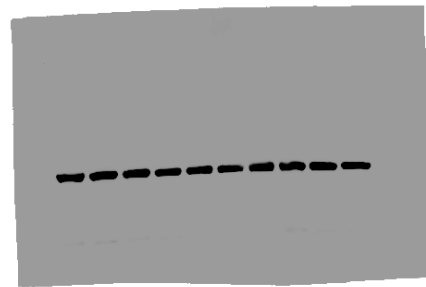

actin



# Figuer3 C

RKO细胞CDK2降解

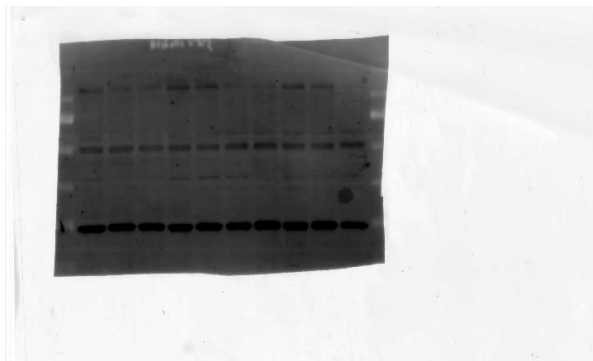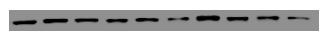

CDK2

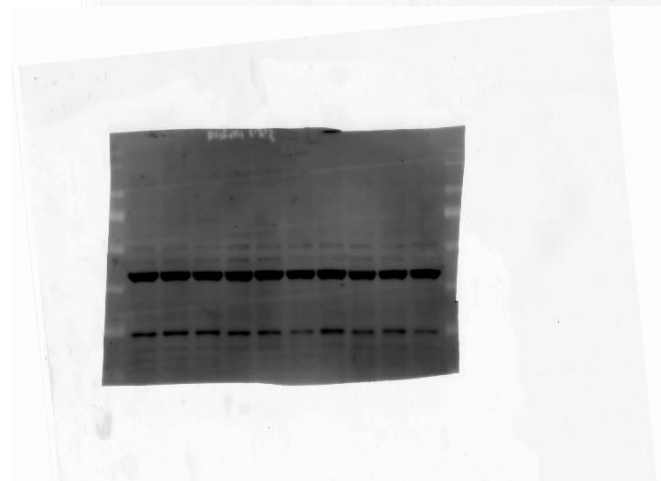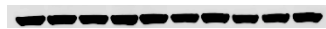

ACTIN

PHIP

Figuer3 E

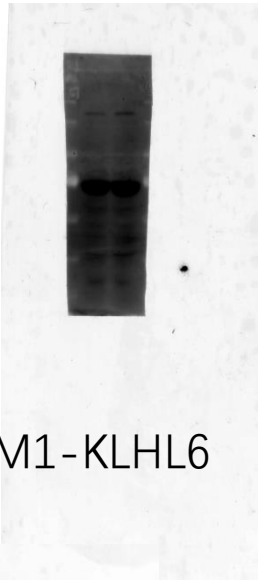

M1-KLHL6

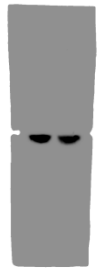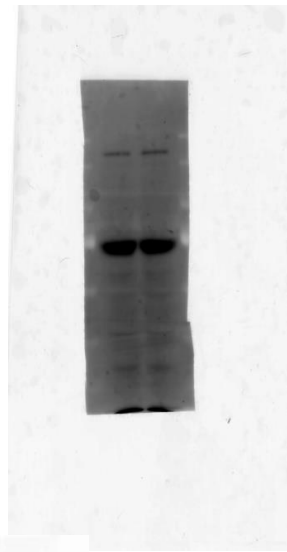

M1-PHIP

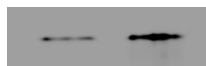

M2-PHIP

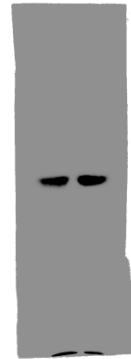

M1-actin

M2-KLHL6

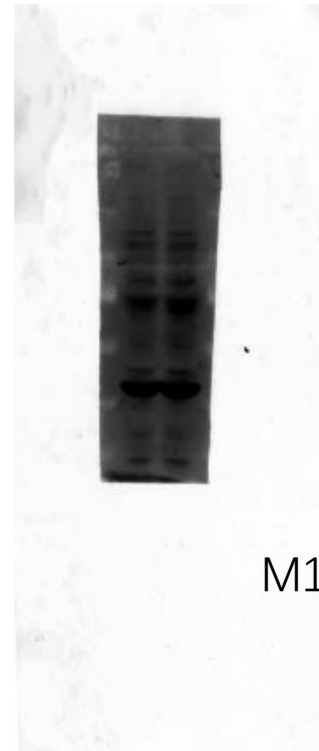

M2-actin

Figuer3 F

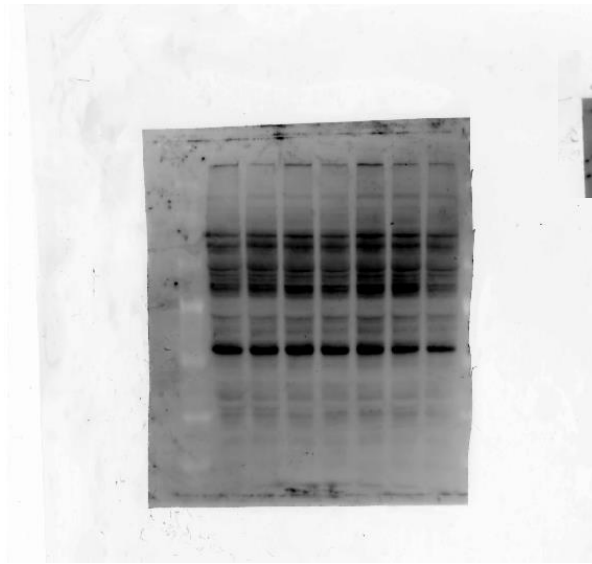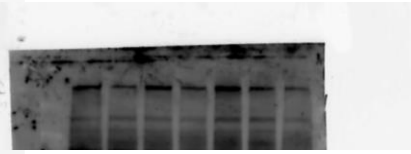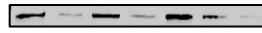

PHIP

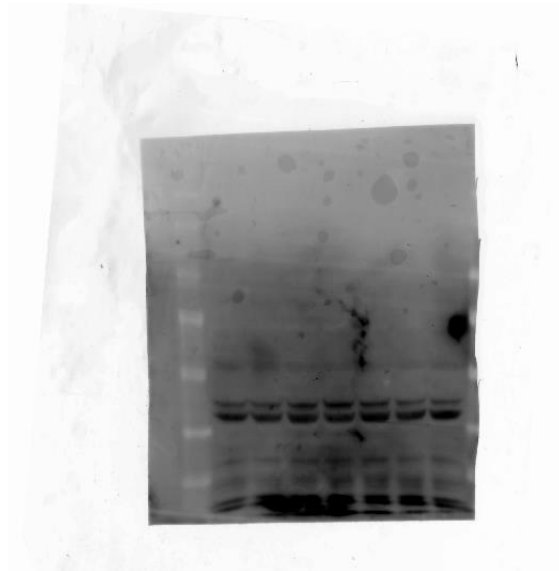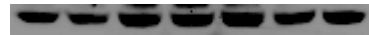

actin

Figuer3 G

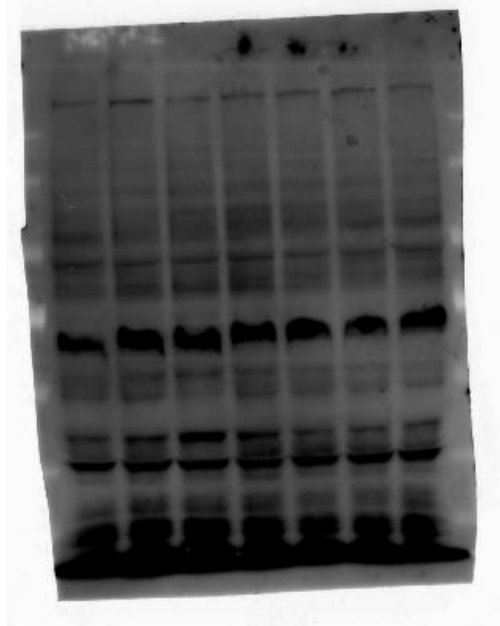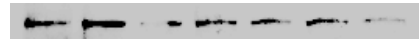

PHIP

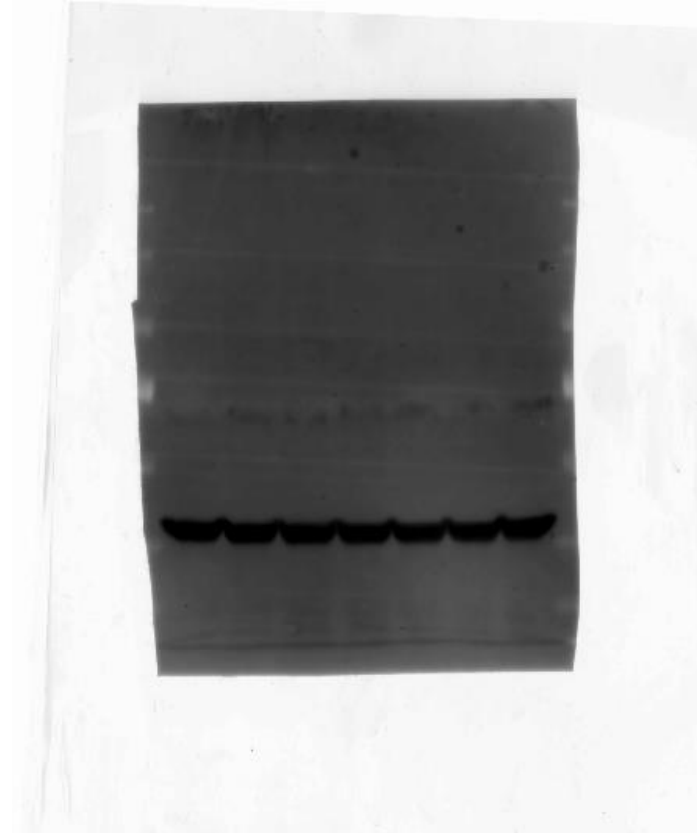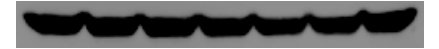

actin

Figuer3 H

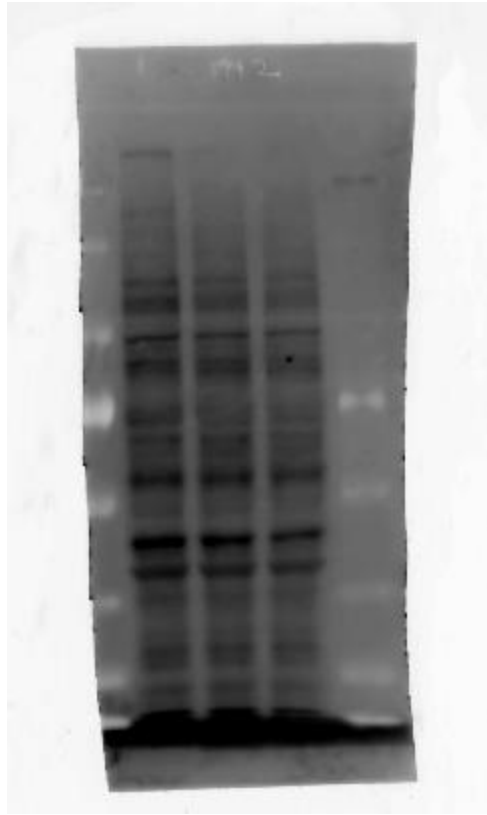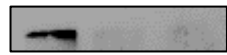

PHIP

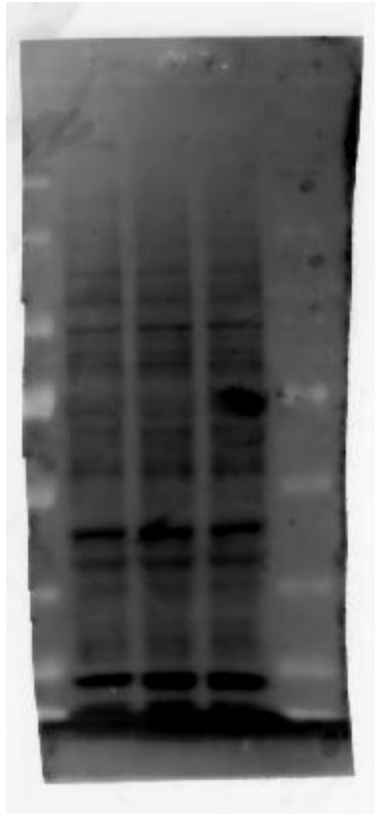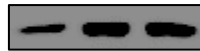

CDK2

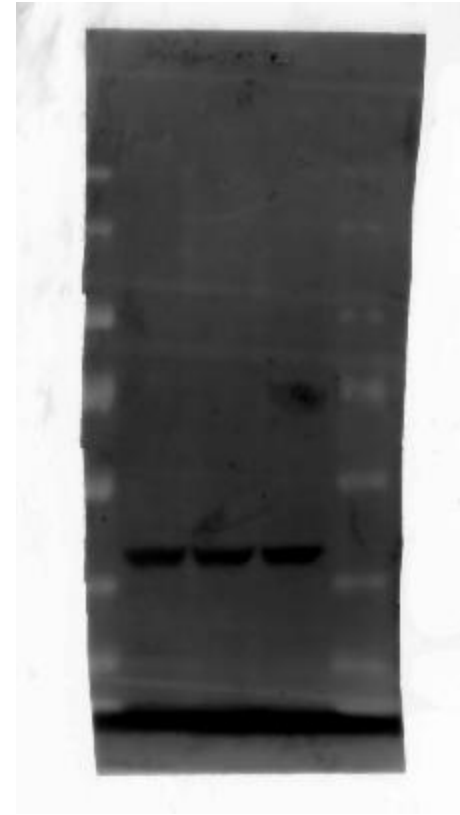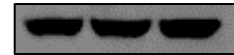

ACTIN

Figuer3 I

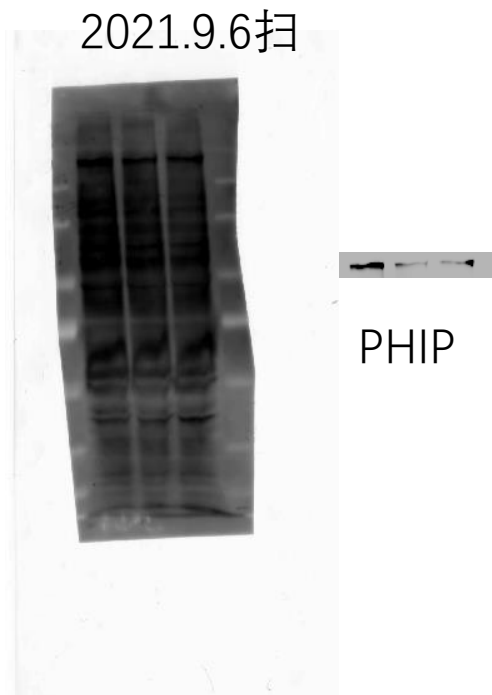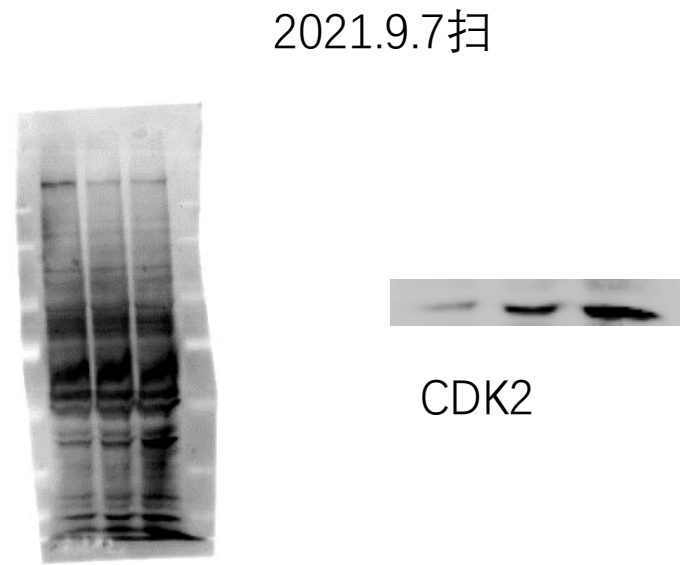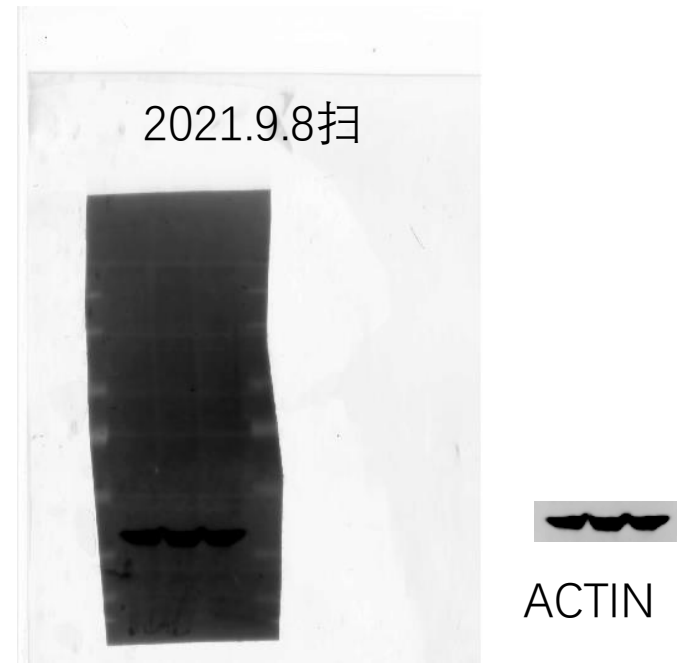

Figuer3 J

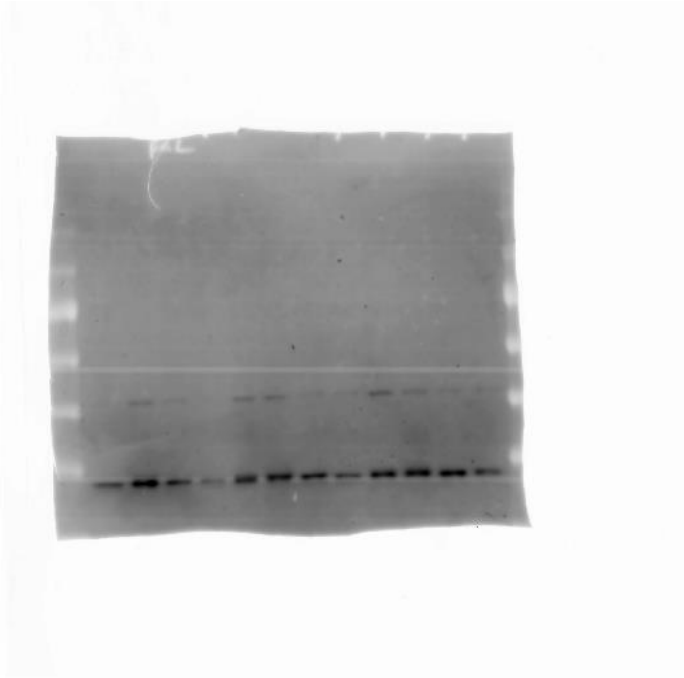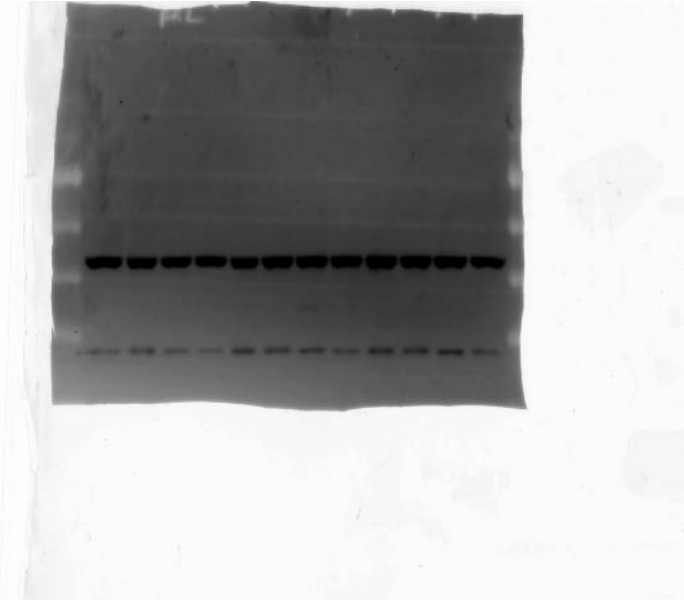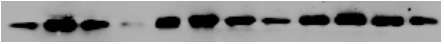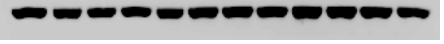

Figuer3 K

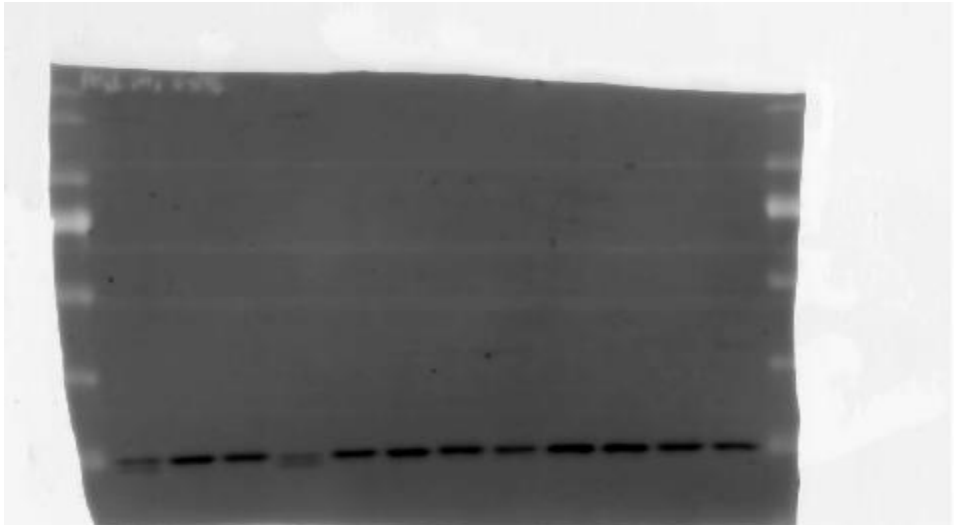

CDK2

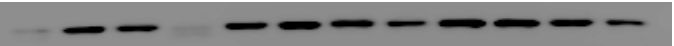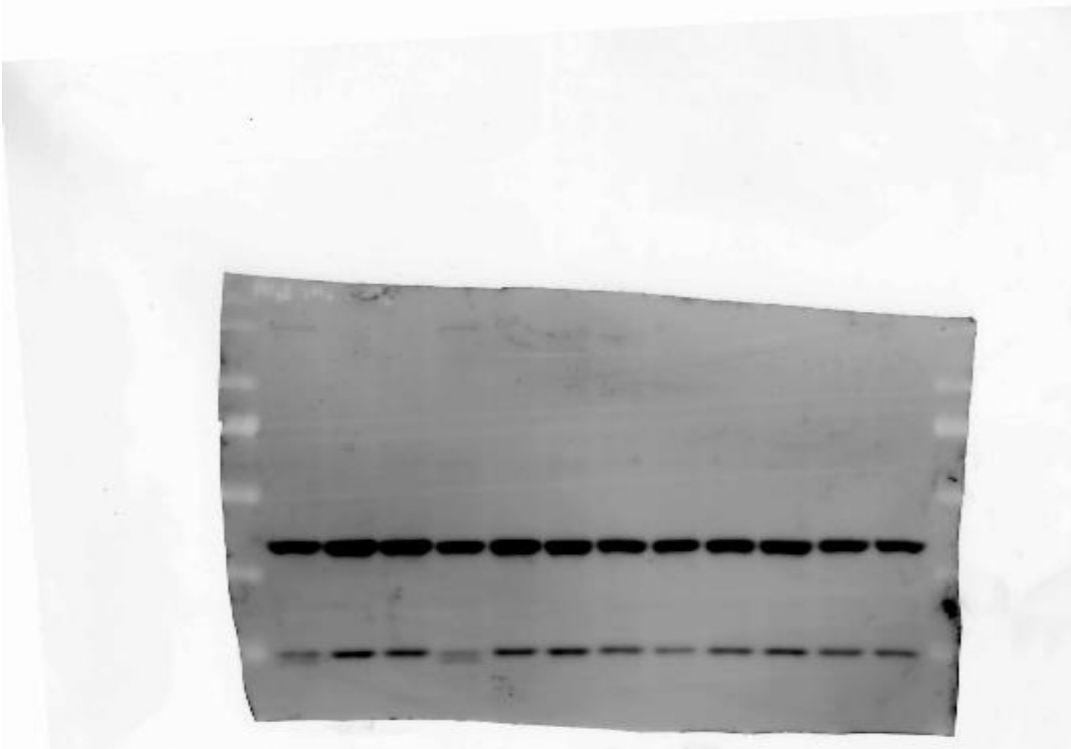

ACTIN

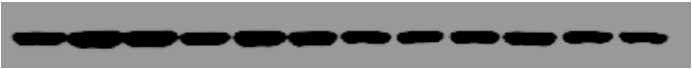



Figuer3 L

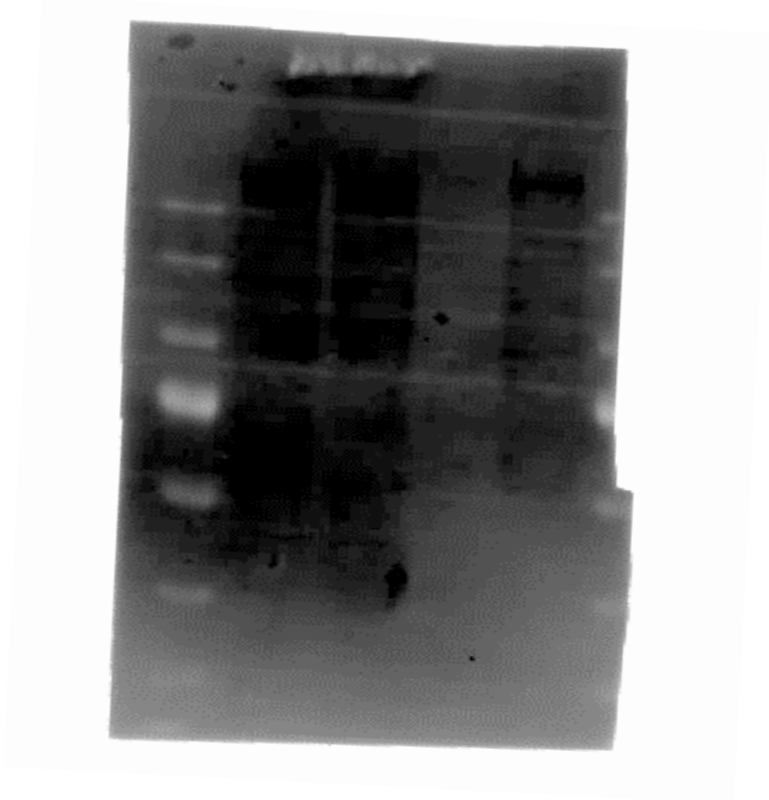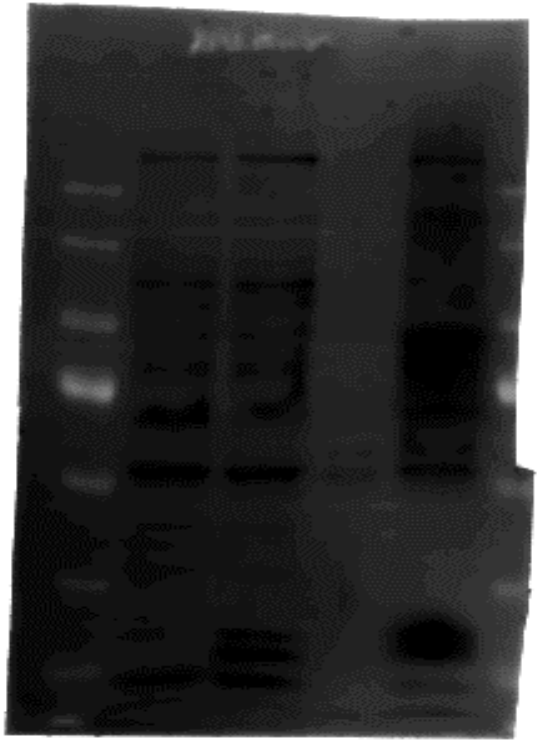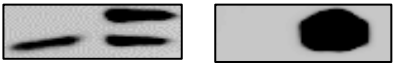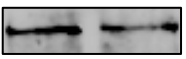

PHIP

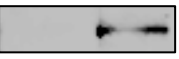

PHIP

Figuer3 M

HCT116

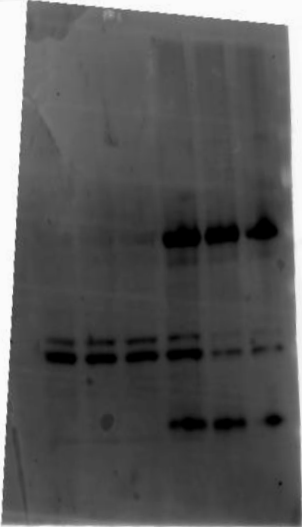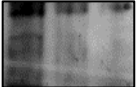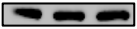

HA

Figuer3 N

RKO

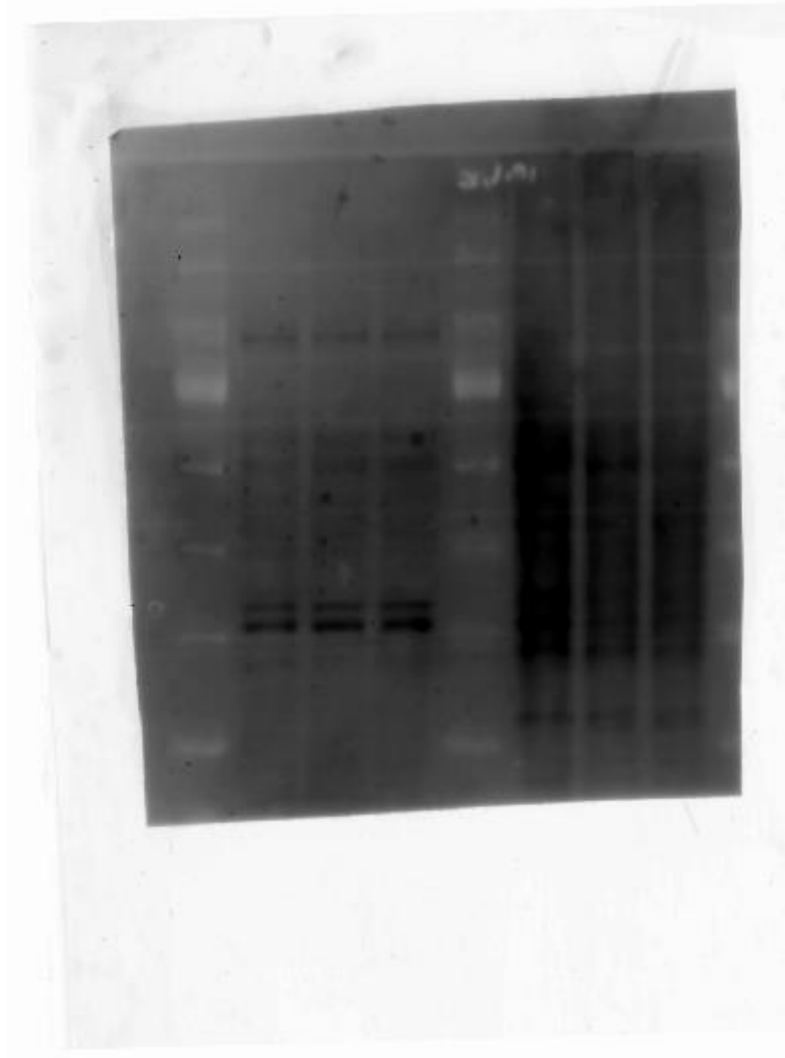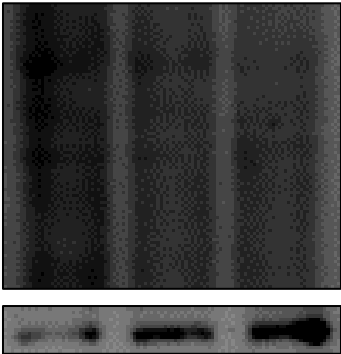

Figuer4 D

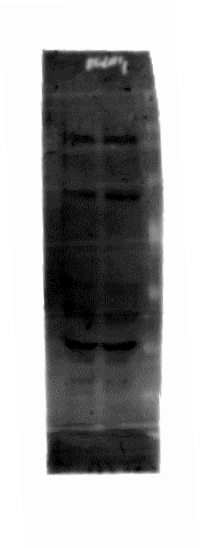

M1-SP3

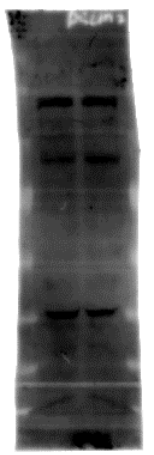

M2-SP3

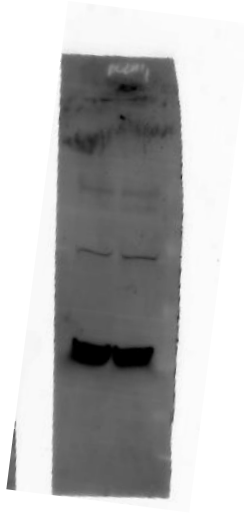

M1-SP1

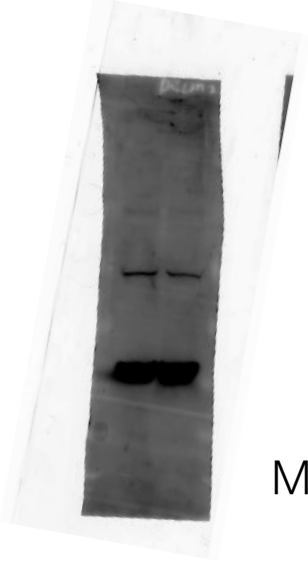

M2-SP1

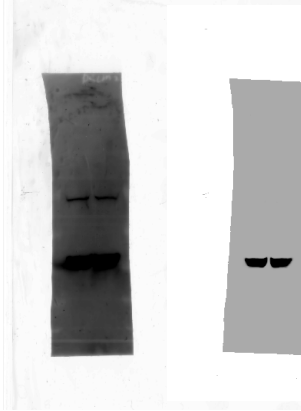

M1-actin

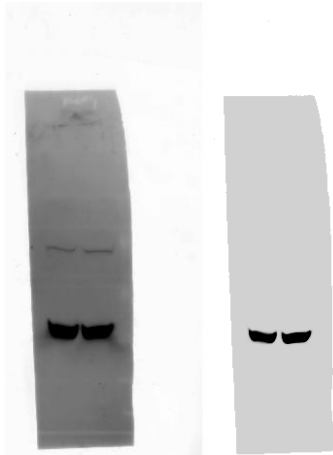

M2-actin

Figuer4 D

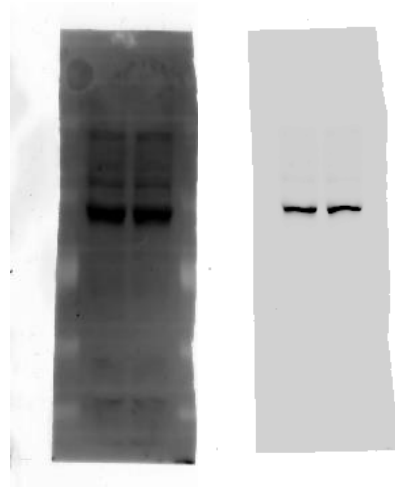

M3-SP2

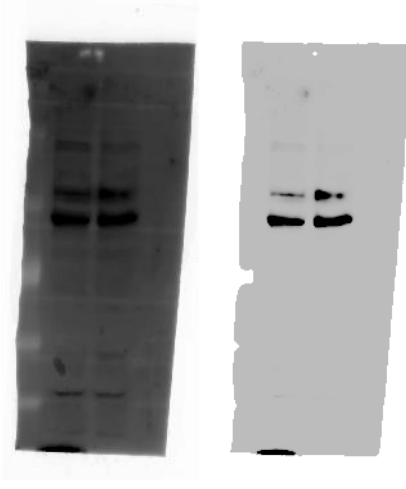

M4-SP2

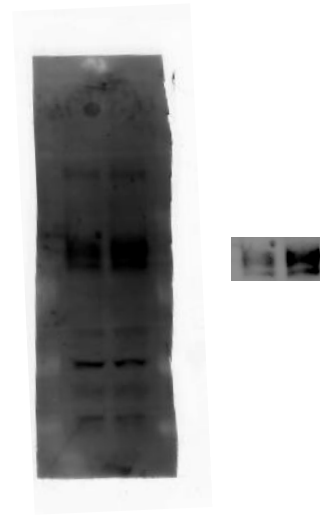

M3-FOXO1

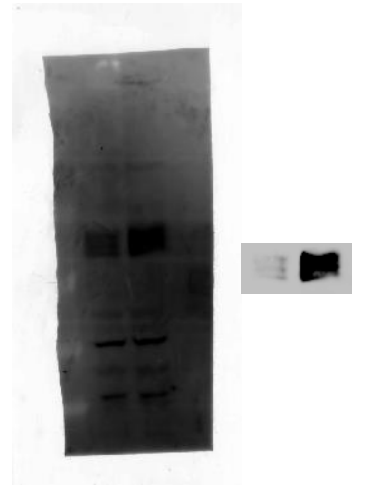

M4-FOXO1

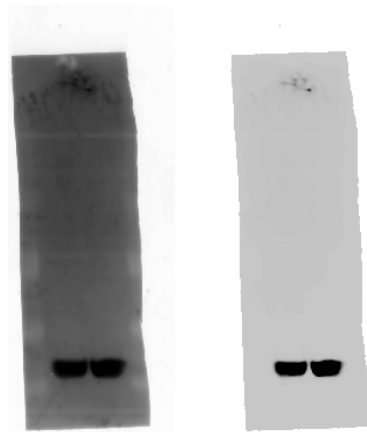

M3-ACTIN

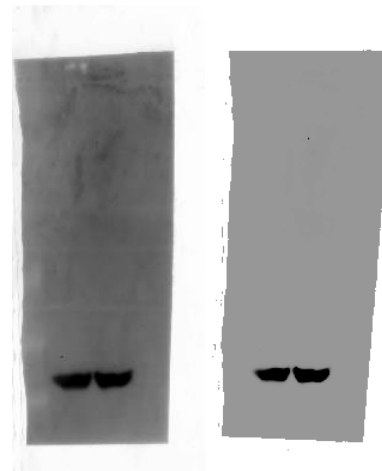

M4-ACTIN

Figuer4 O

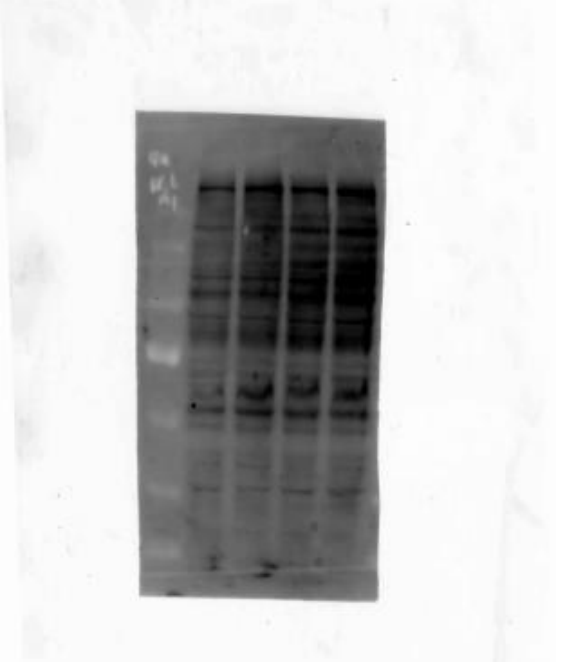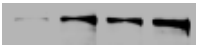

PHIP

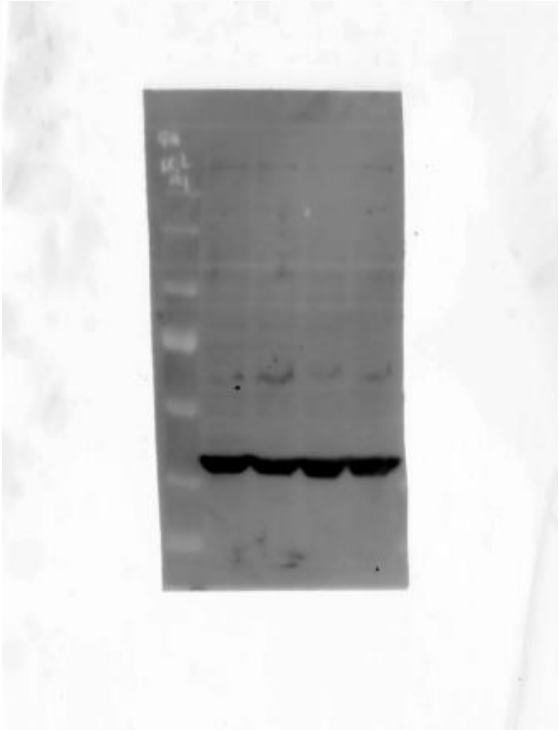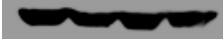

ACTIN

Figuer4 P

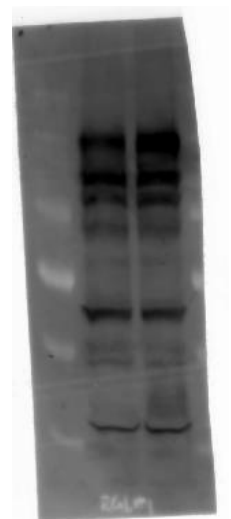

M1-DNMT3A

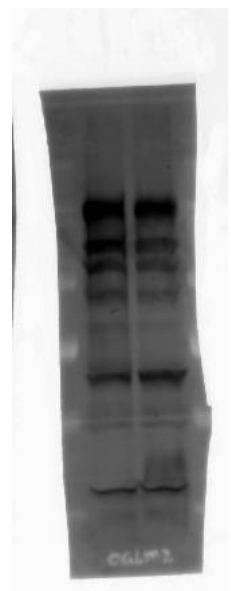

M2-DNMT3A

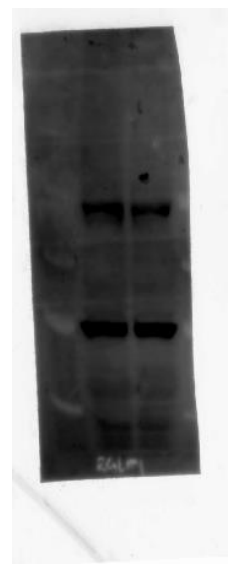

M1 DNMT3B

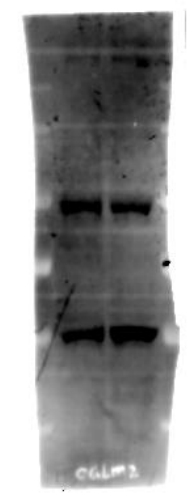

M2 DNMT3B

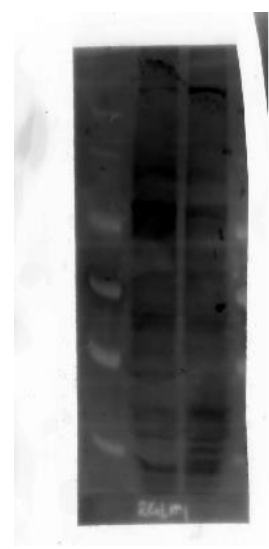

M1-DNMT1

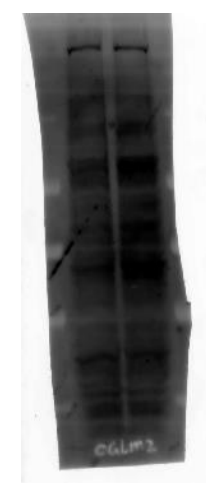

M2-DNMT1

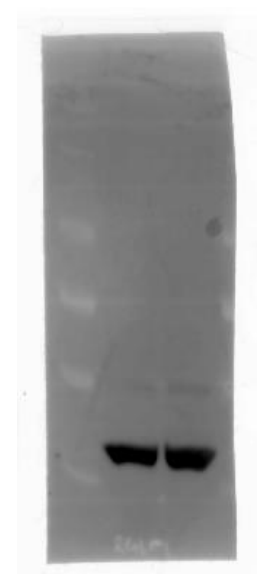

M1 B-ACTIN

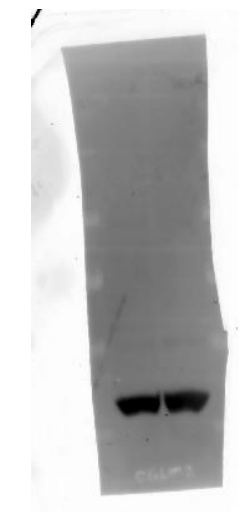

M2 B-ACTIN

Figuer4 Q

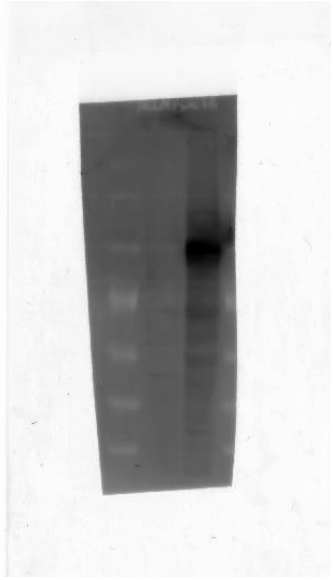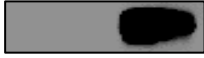

HA

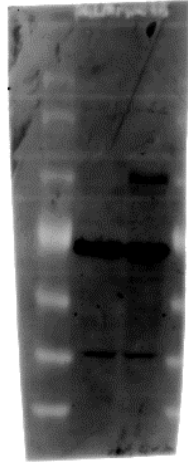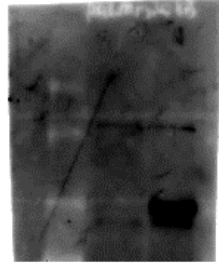

DNMT3B

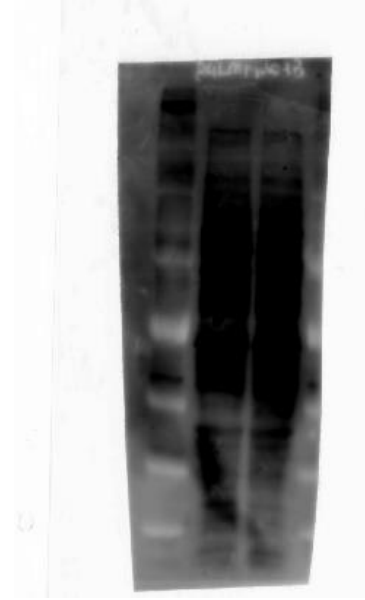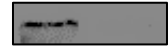

PHIP

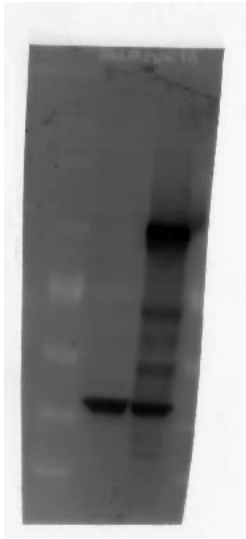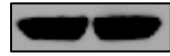

ACTIN



Figuer4 R

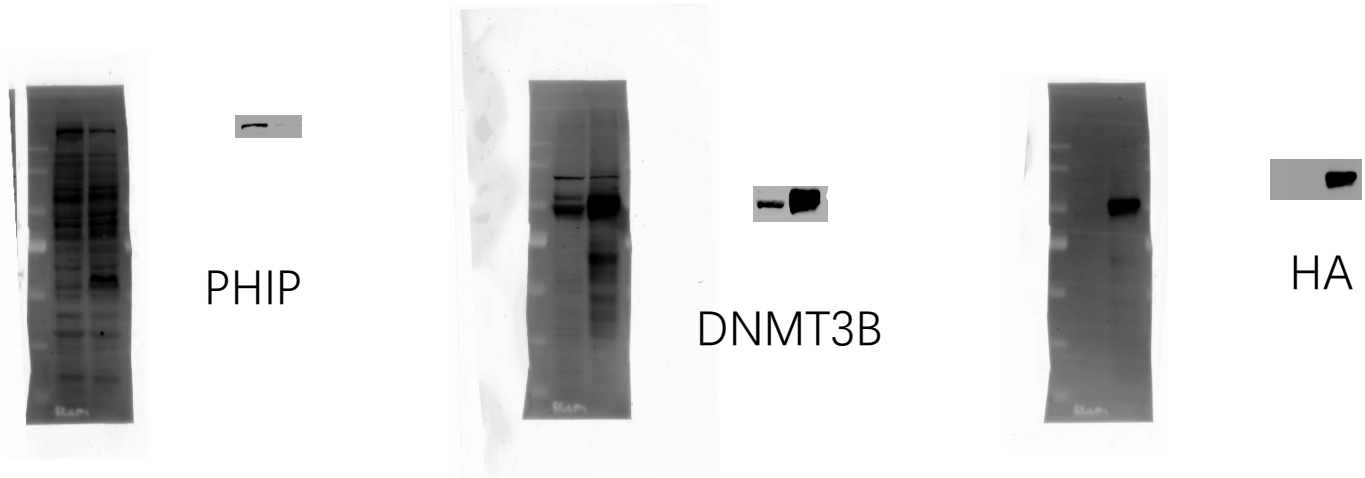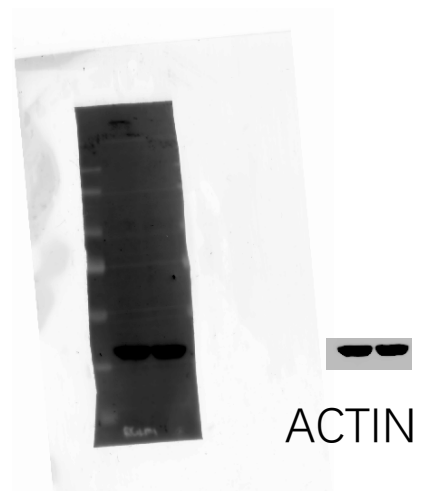

Figuer5 D

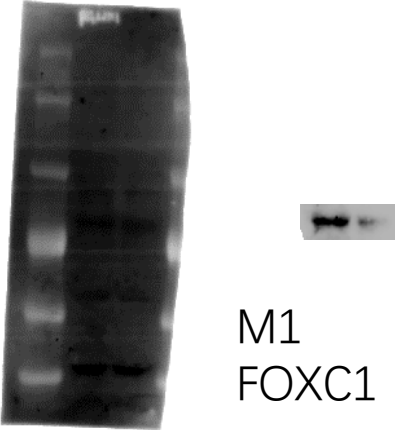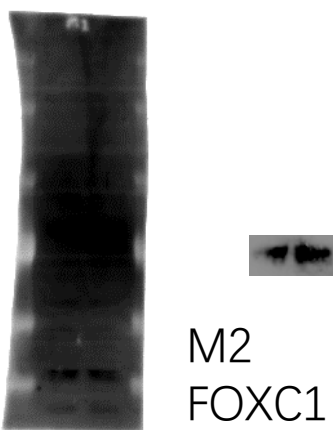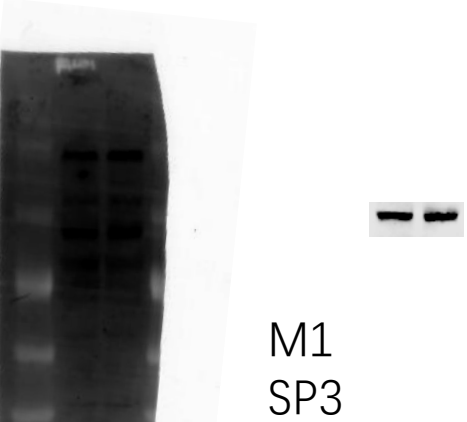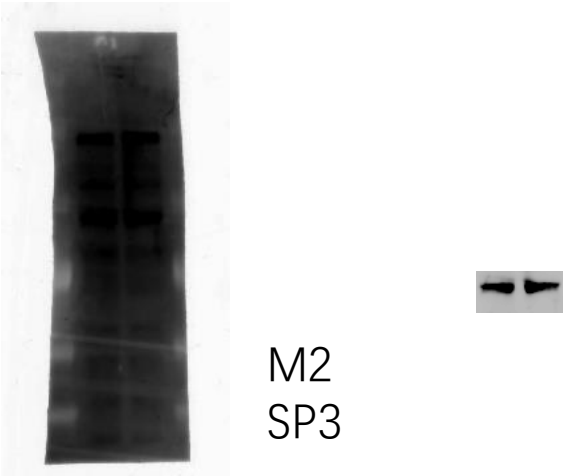

Figuer5 D

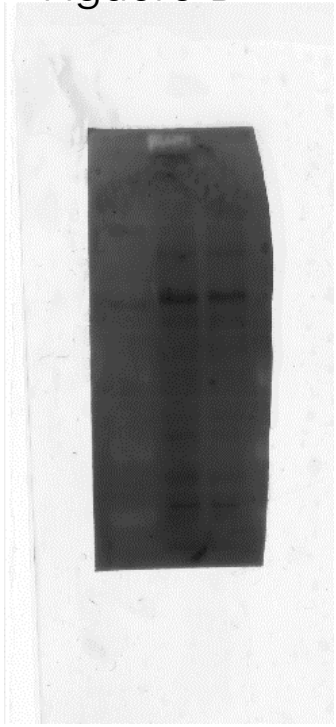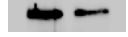

M1 SP1

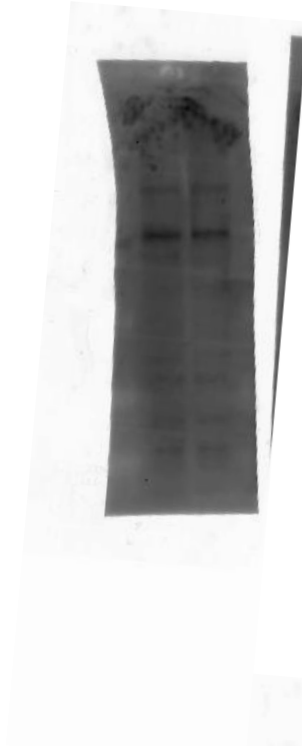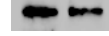

M2 SP1

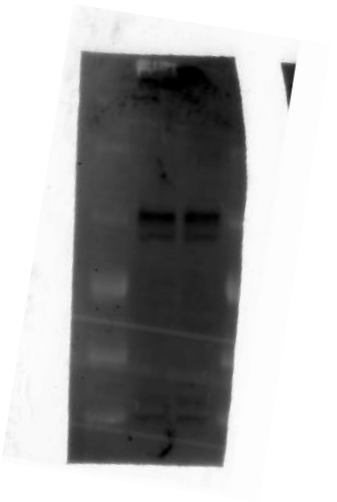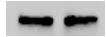

M1 FOXO3A

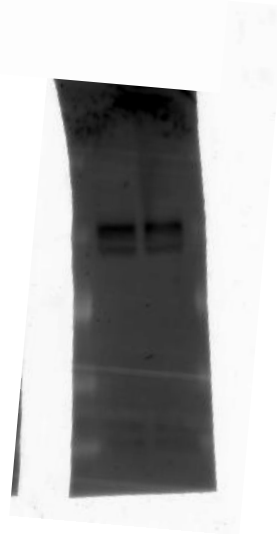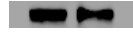

M2 FOXO3A

Figuer5 D

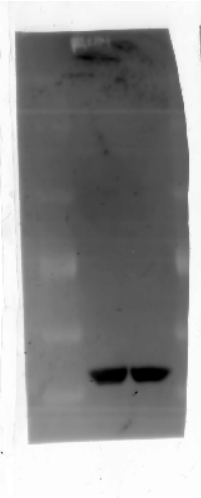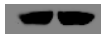

M1 ACTIN

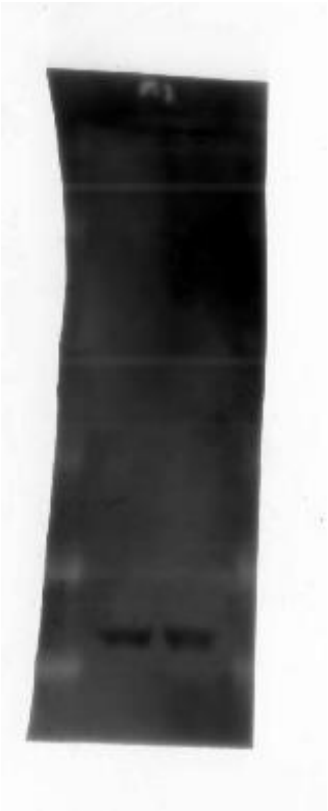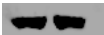

M2 ACTIN

Figuer5 E

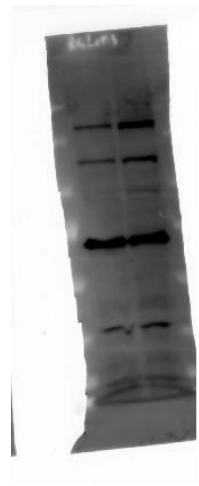

DNMT3B

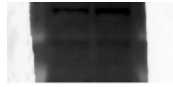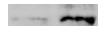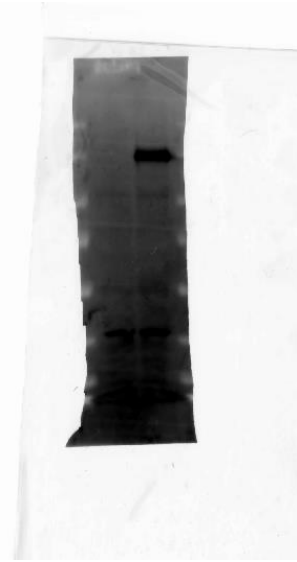

SP1

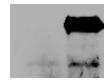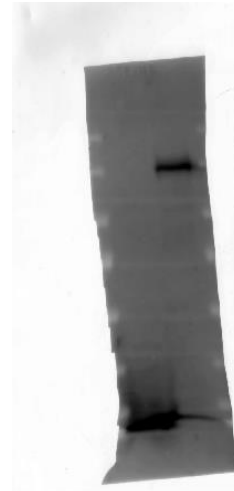

GFP

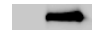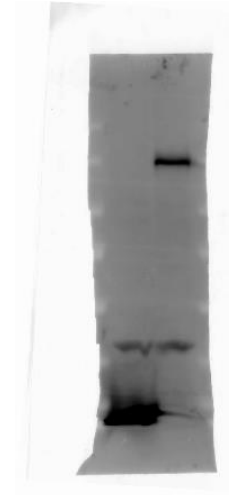

$\beta$ -actin

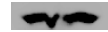

Figuer5 F

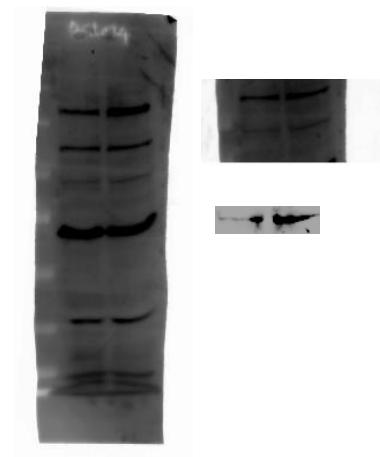

DNMT3B

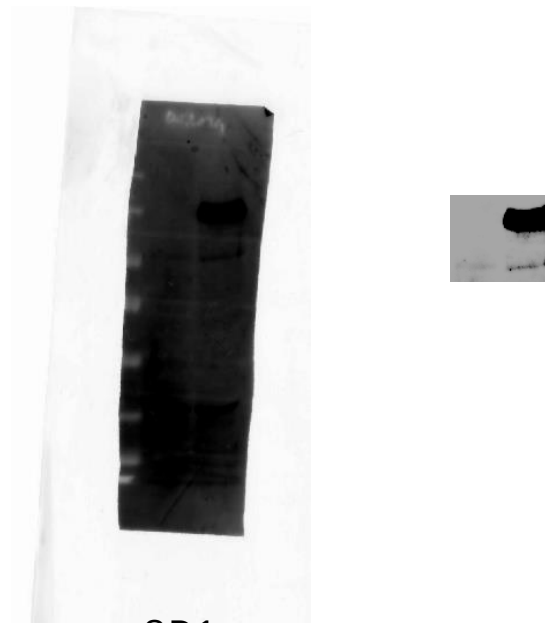

SP1

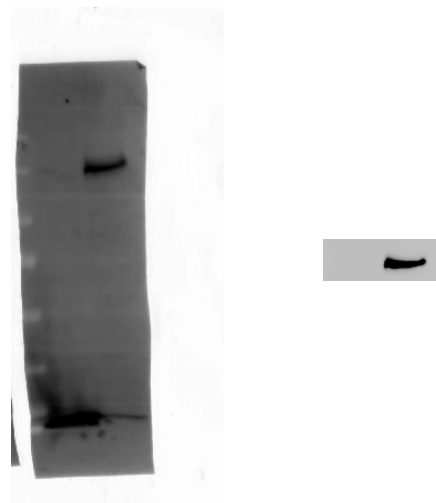

GFP

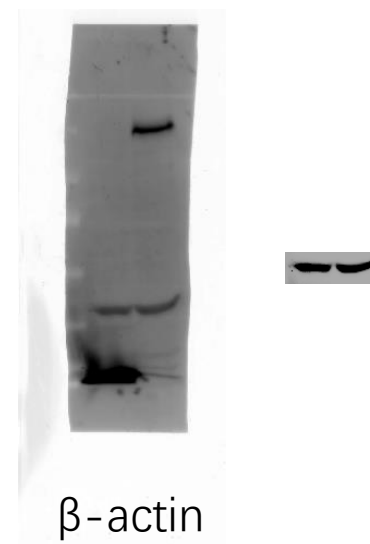

$\beta$ -actin

Figuer6 B

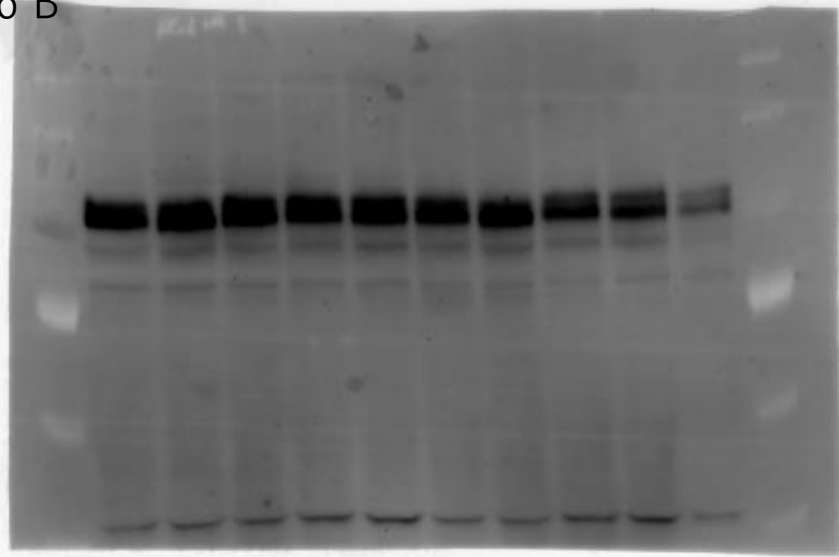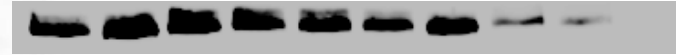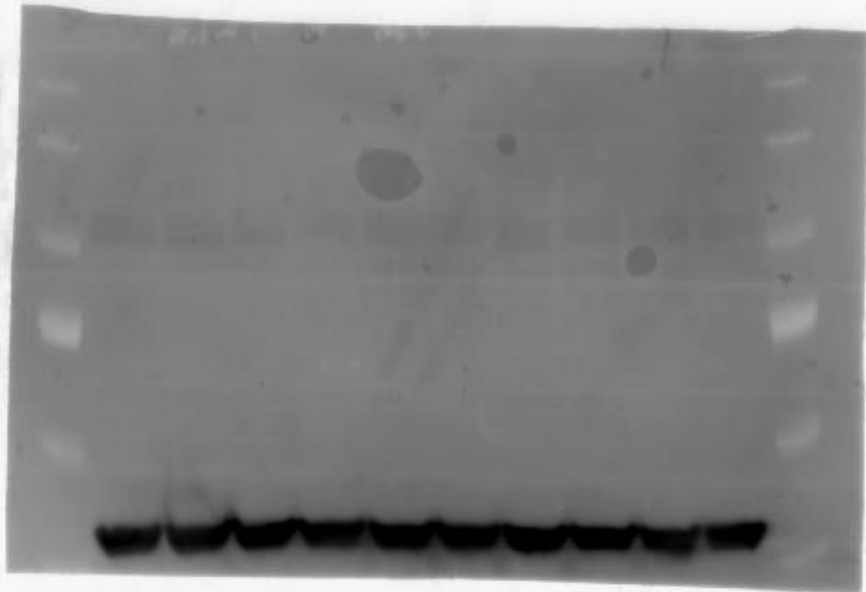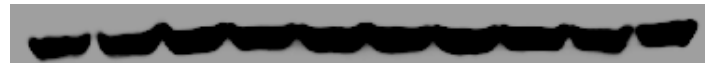

Figuer6 C

RKO-SP1 蛋白降解

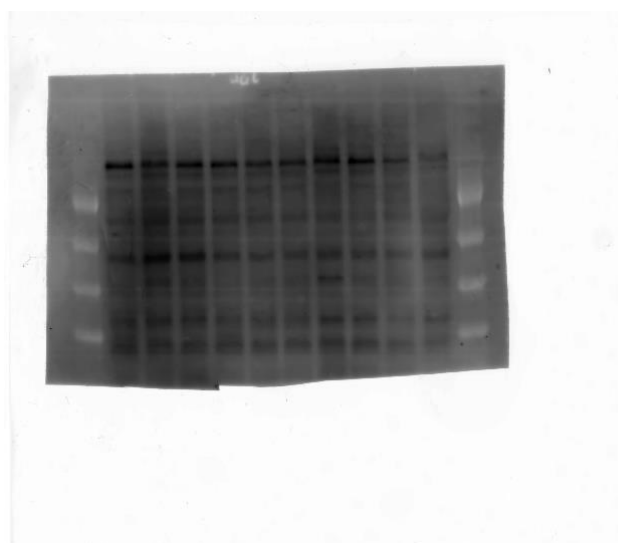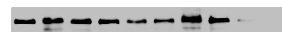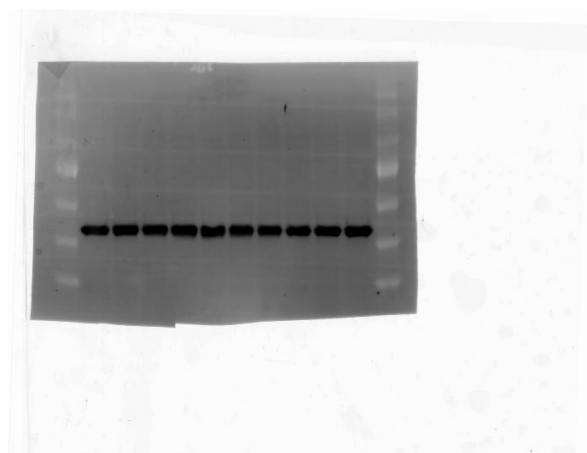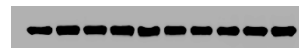



Figuer6 D

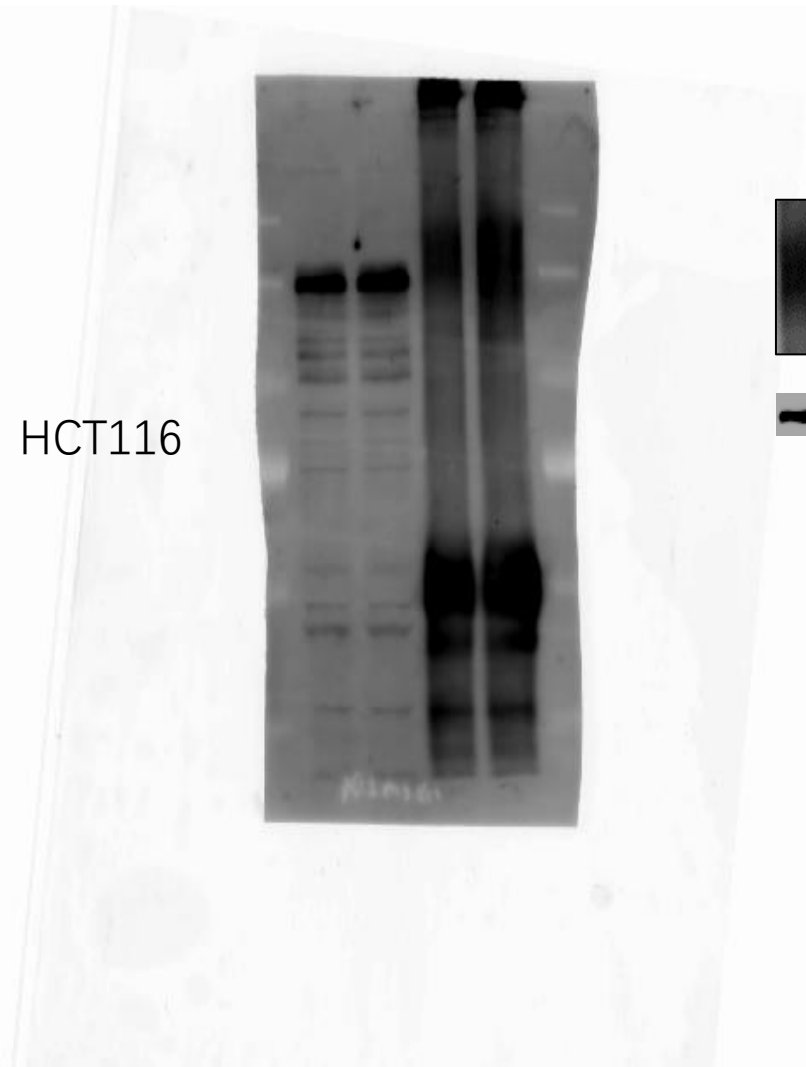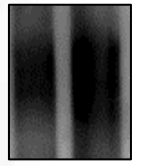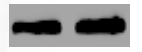

HCT116

Figuer6 E

RKO

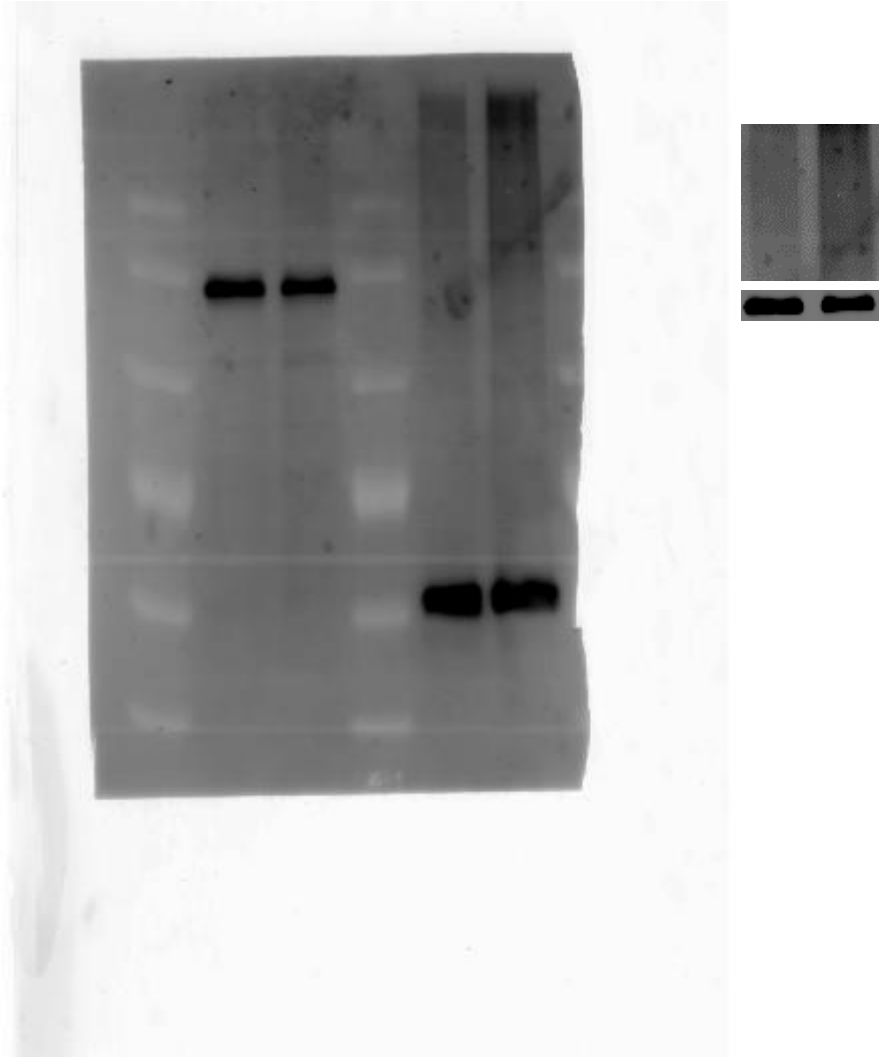

Figuer6 I

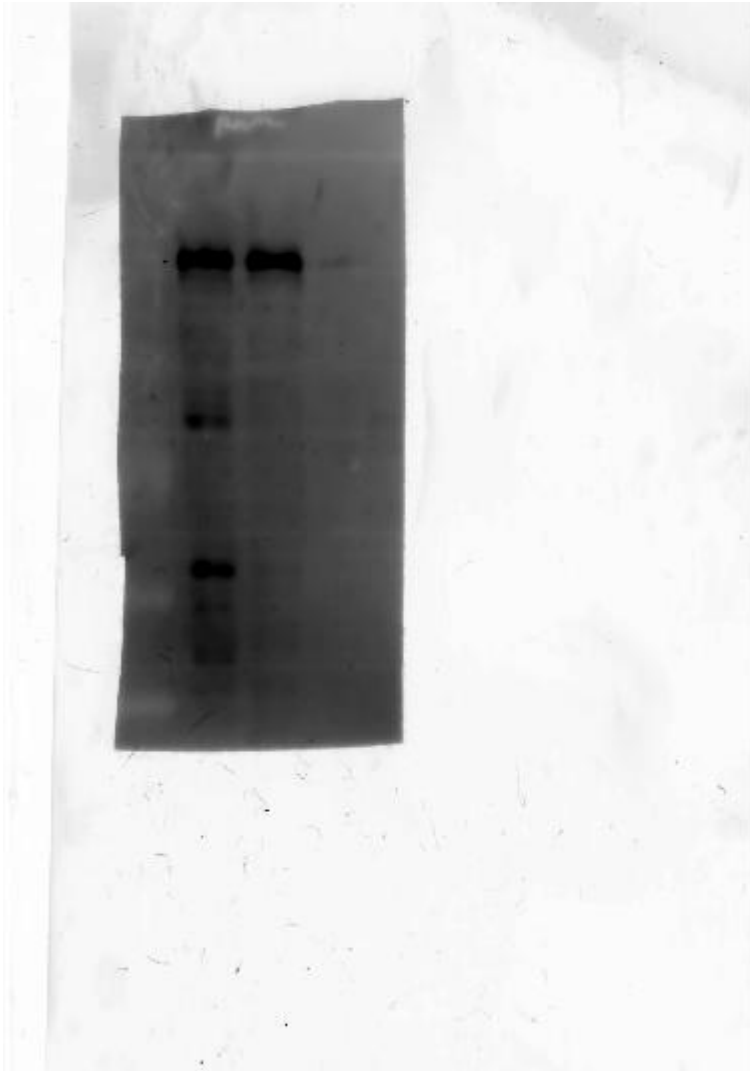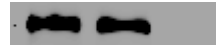

SP1

Figuer6 J

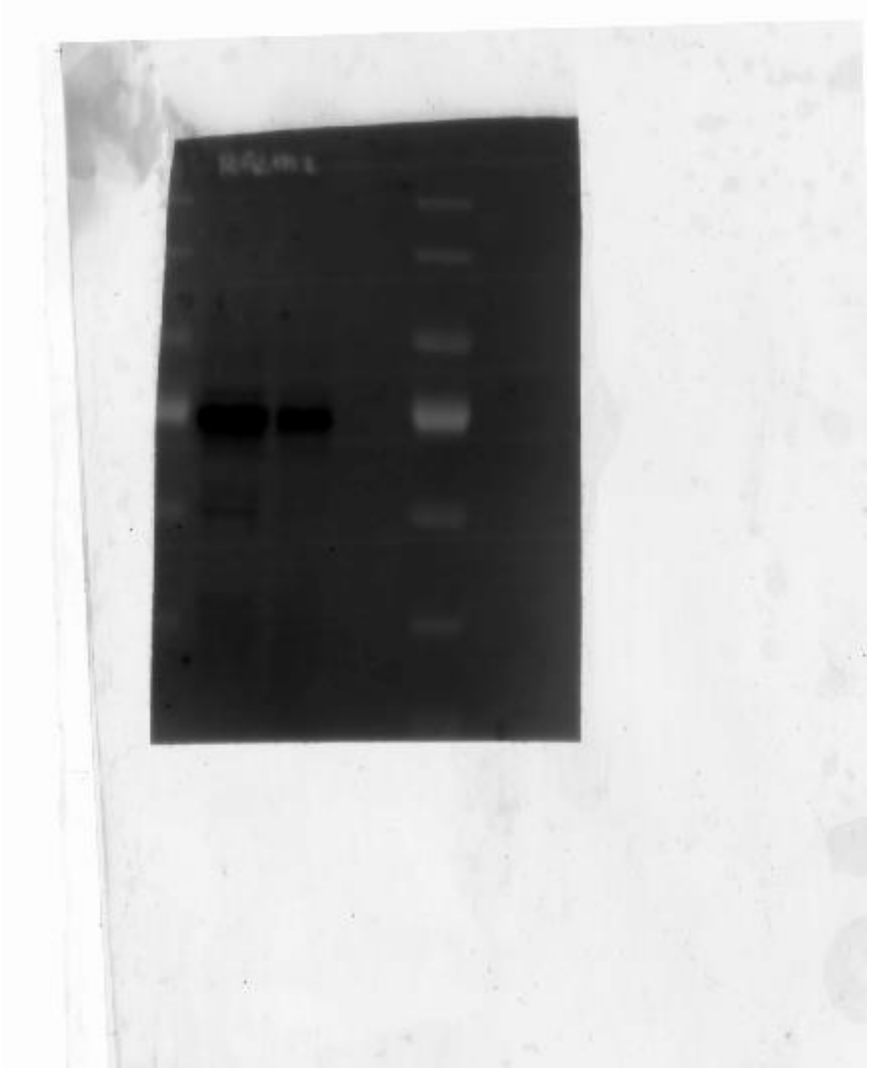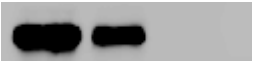

TRIM25

Figuer6 O

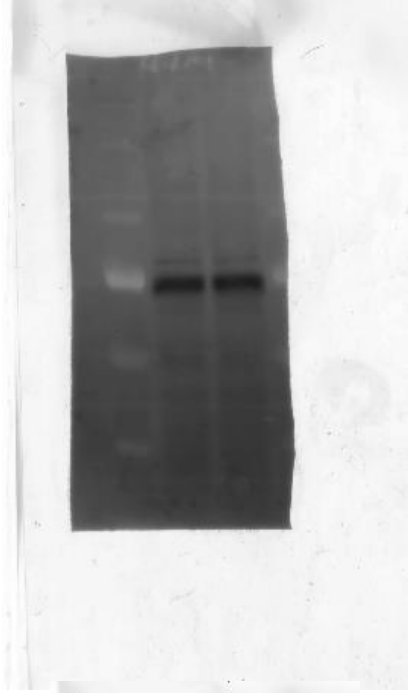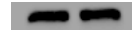

TRIM25

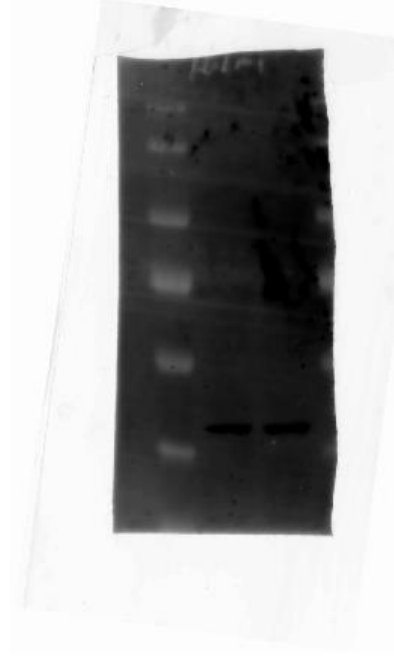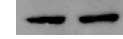

$\beta$ -actin

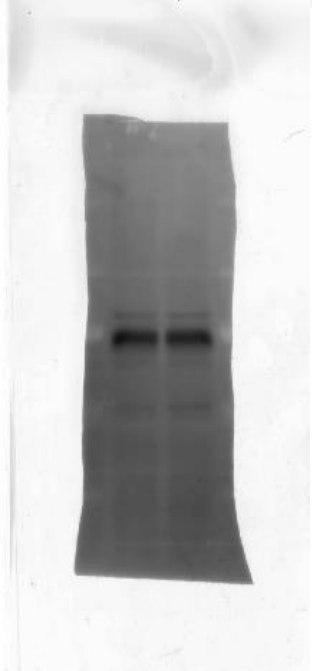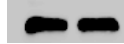

TRIM25

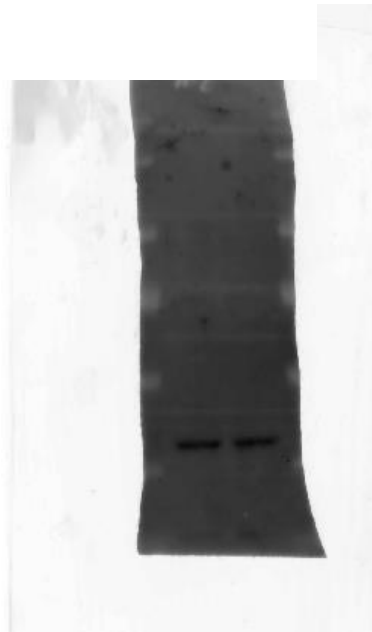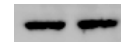

$\beta$ -actin

Figuer6 P

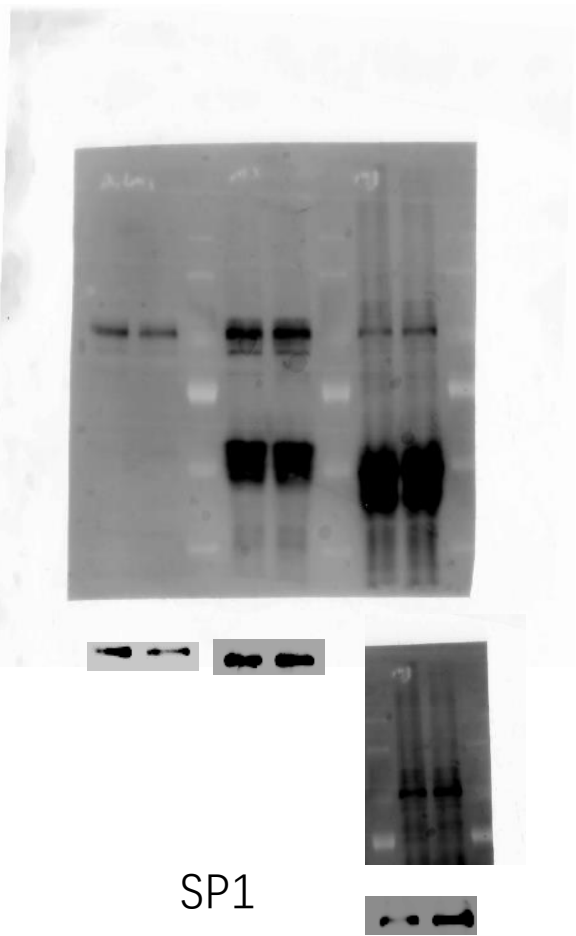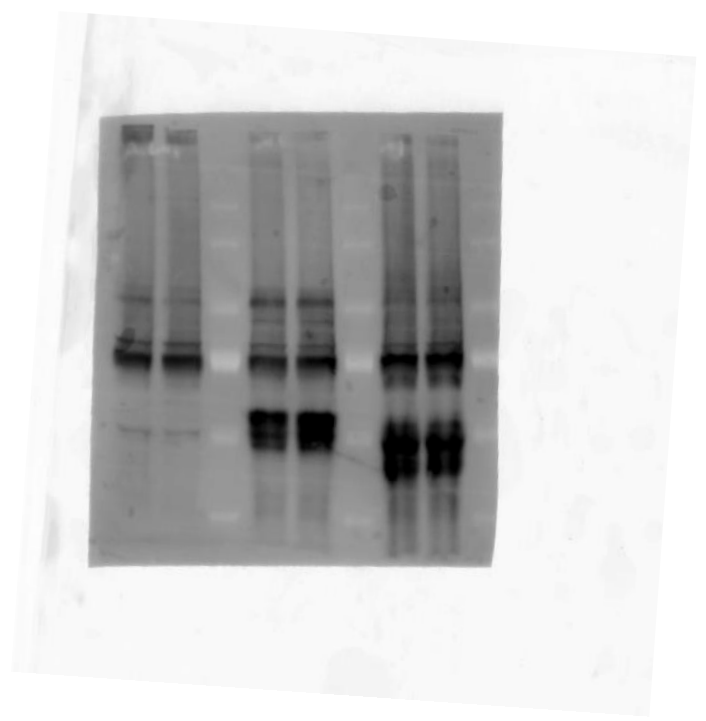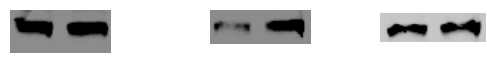

TRIM25

IP互拉 SP1 TRIM25 上抗体SP1

Figuer6 Q

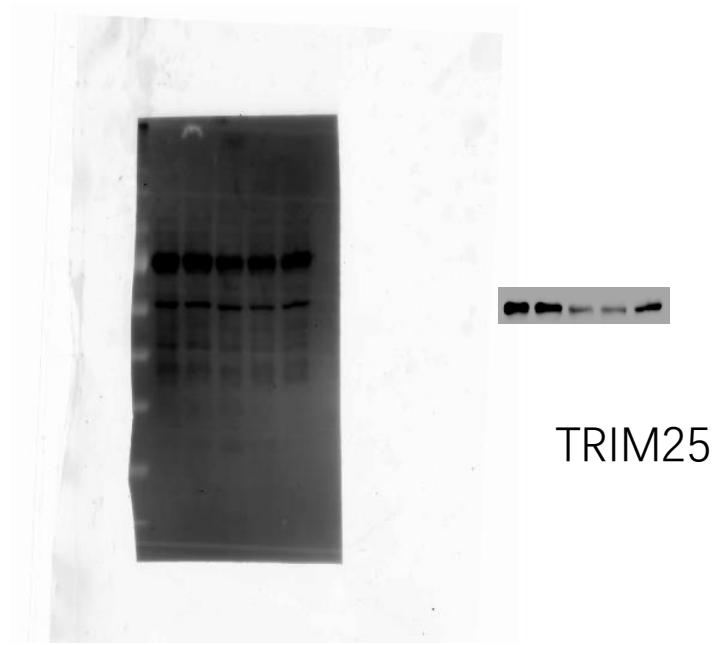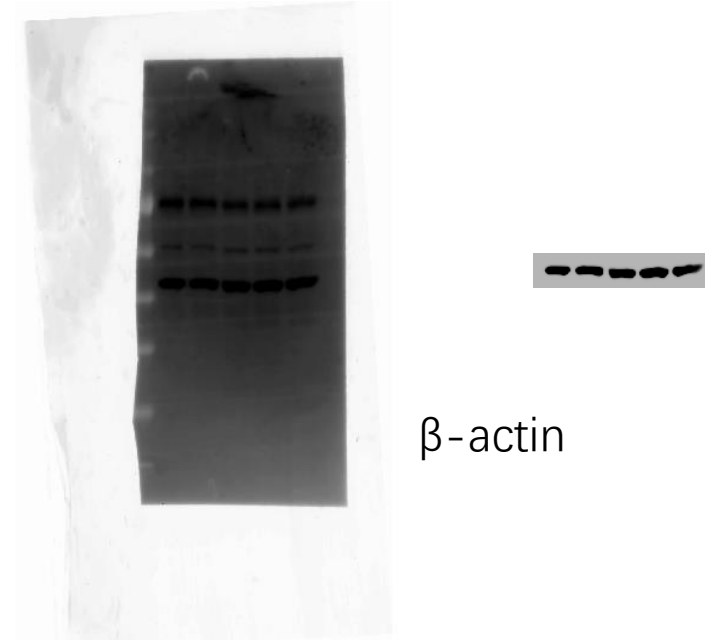

TRIM25敲低 HCT116

Figuer6 R

RKO

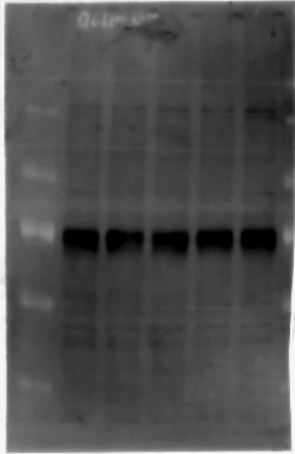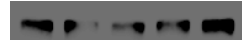

TRIM25

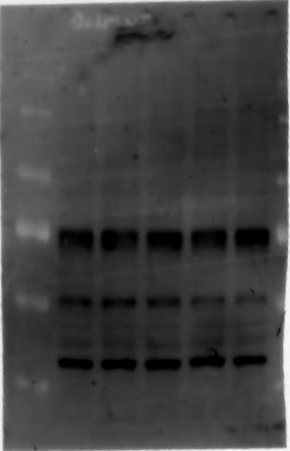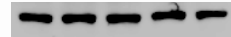

$\beta$ -actin



Figuer6 S

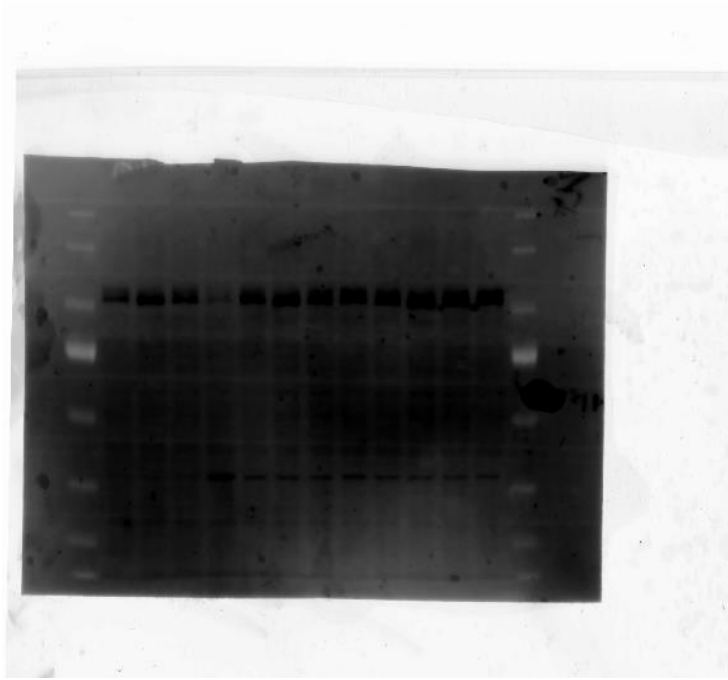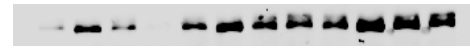

SP1

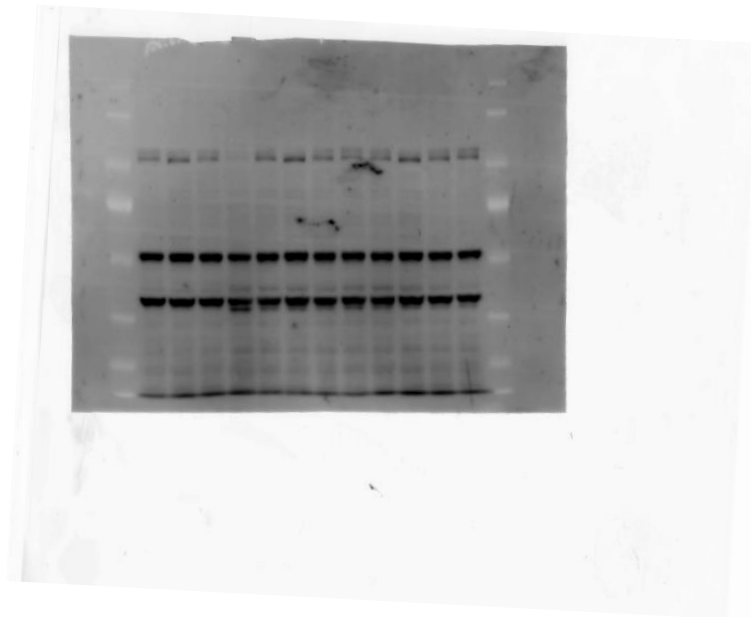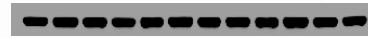

tubulin

Figuer6 T

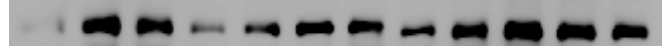

SP1

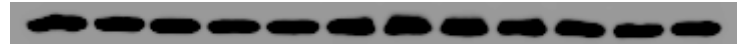

$\beta$ -actin

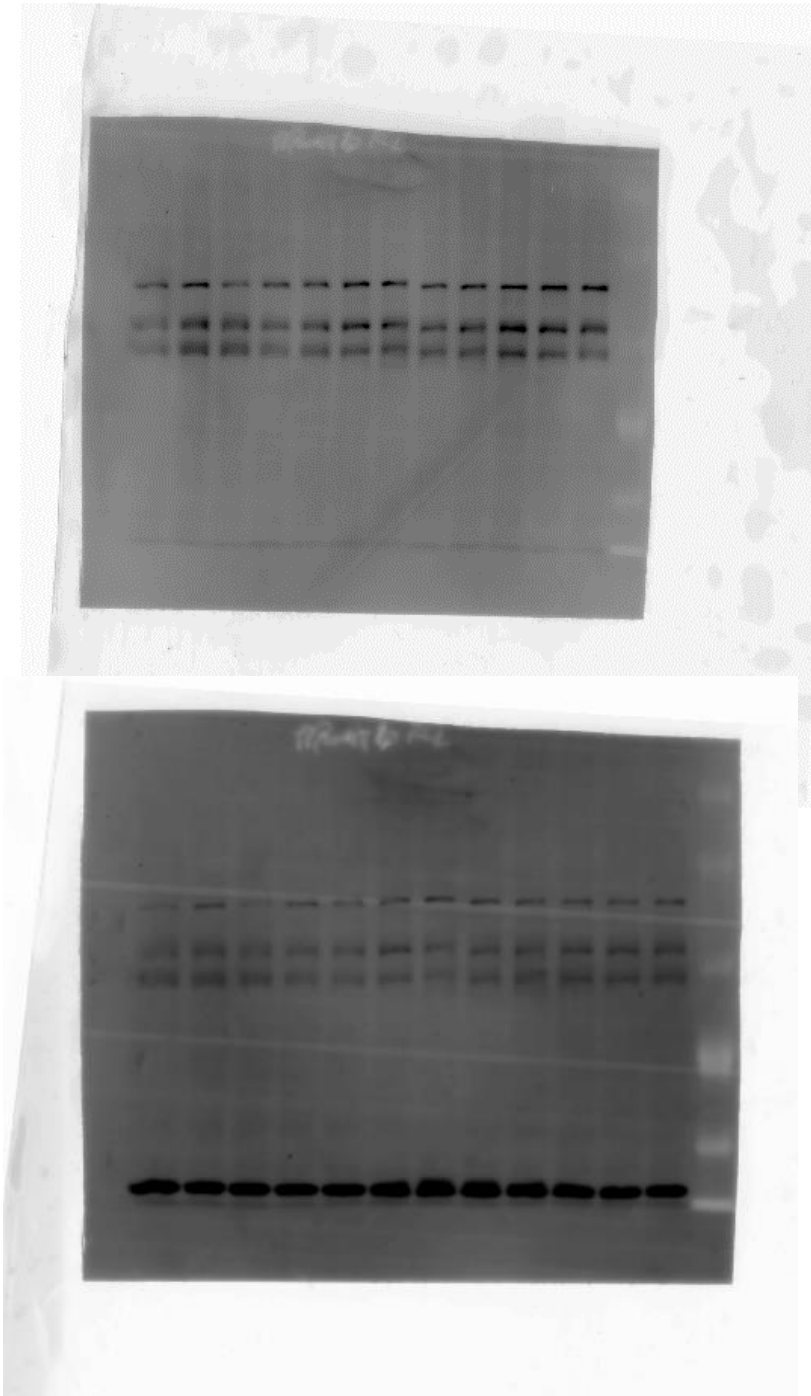

Figuer6 U

HCT116

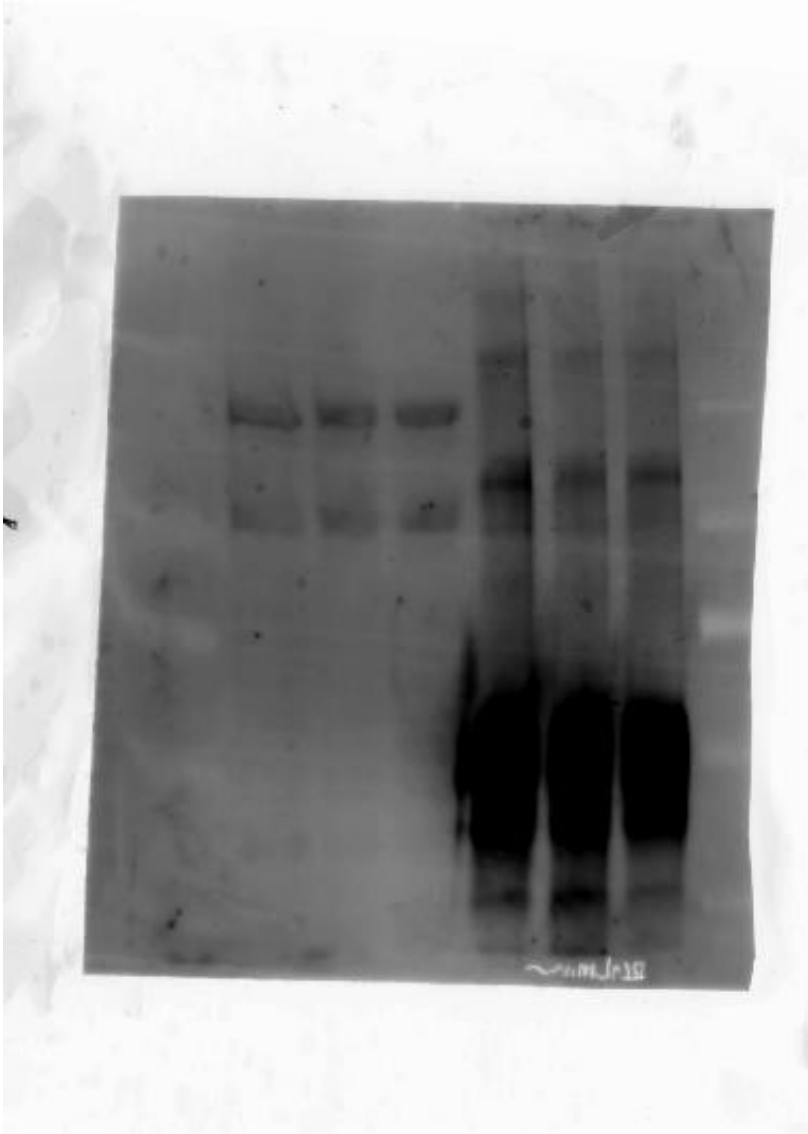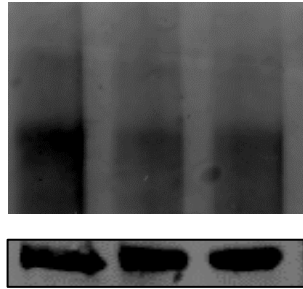

Figuer6 V

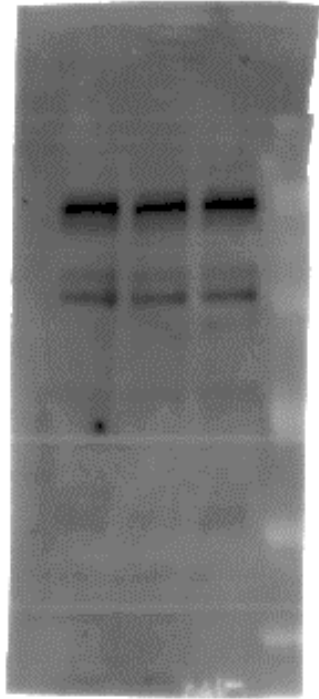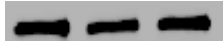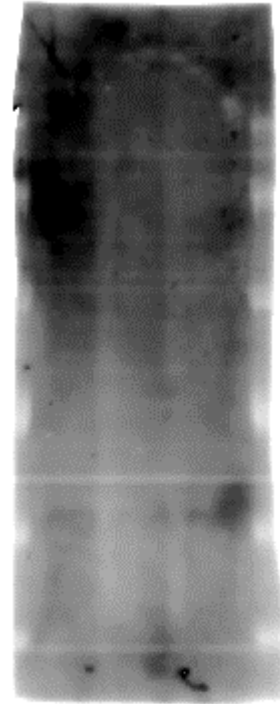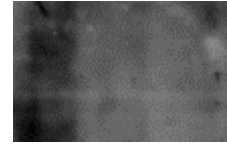

Figuer7 C

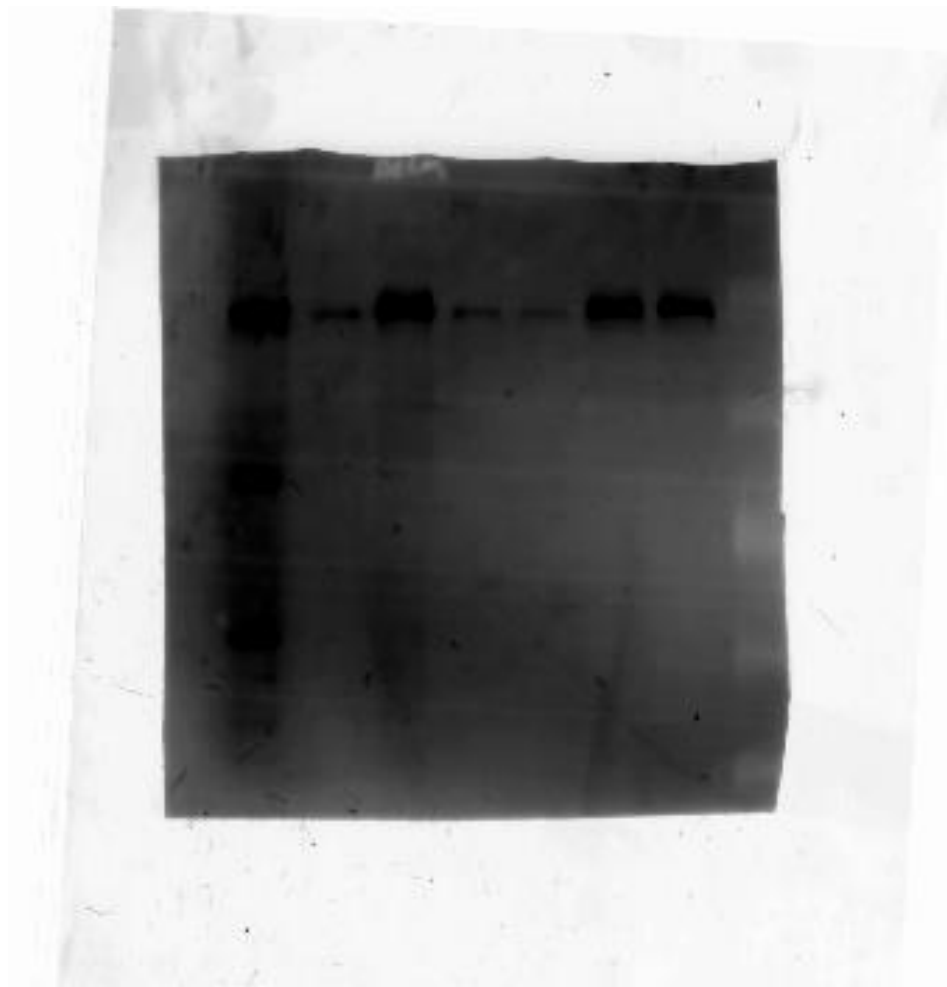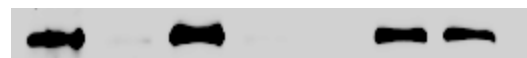

GFP-SP1

Figuer7 D

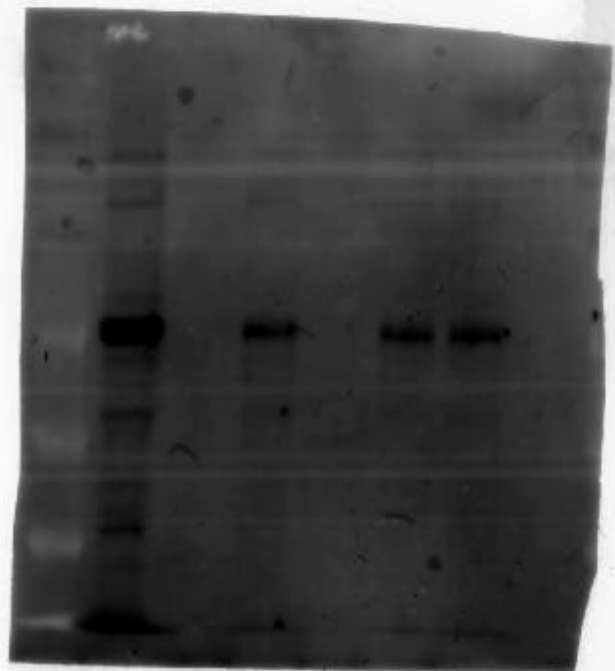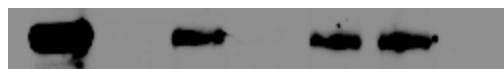

HA-TRIM25

Figuer7 H

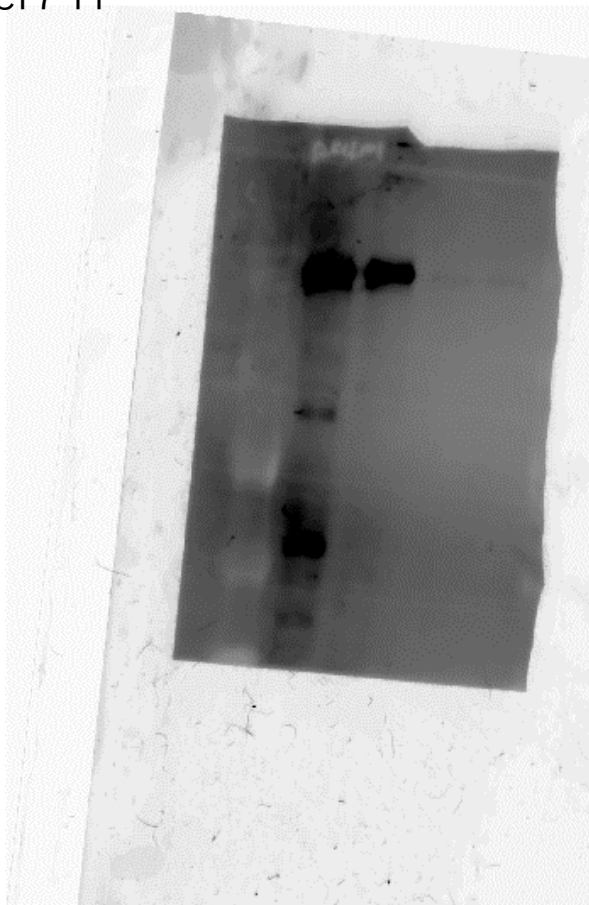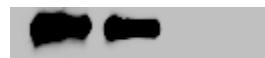

GFP-SP1

Figuer7 I

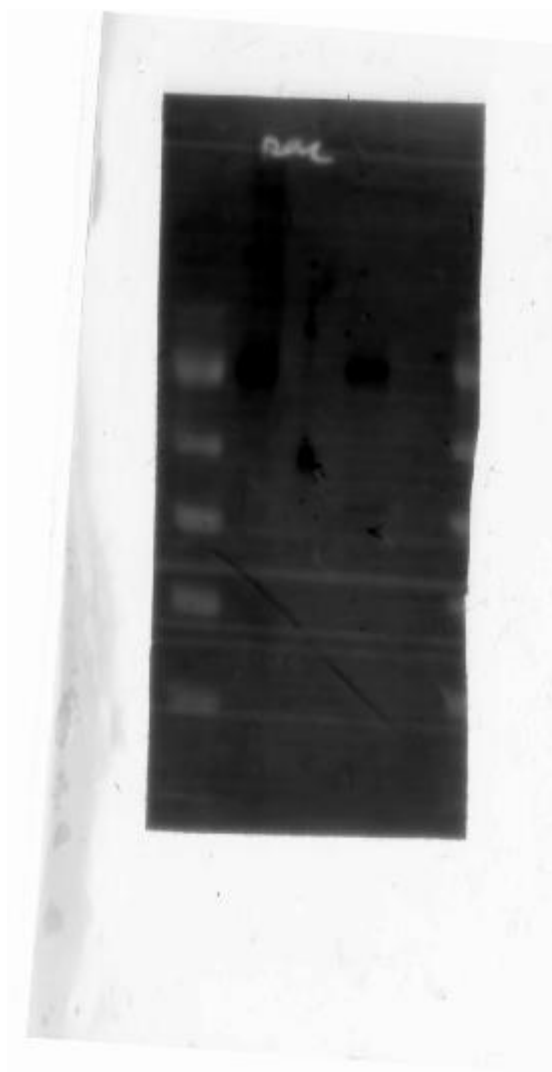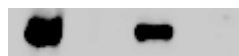

HA-TRIM25



Figuer7 J

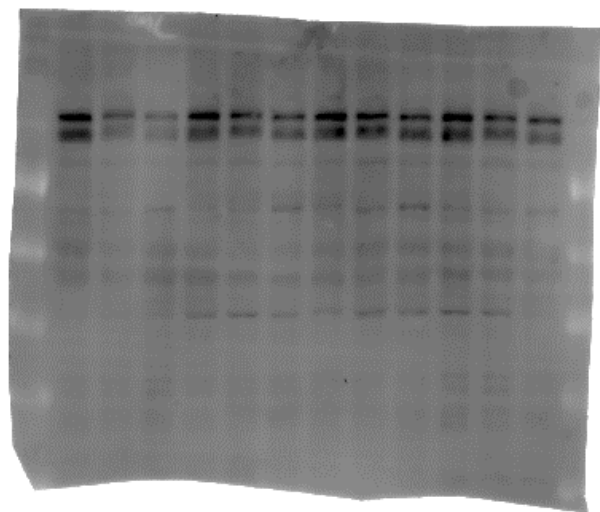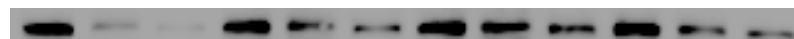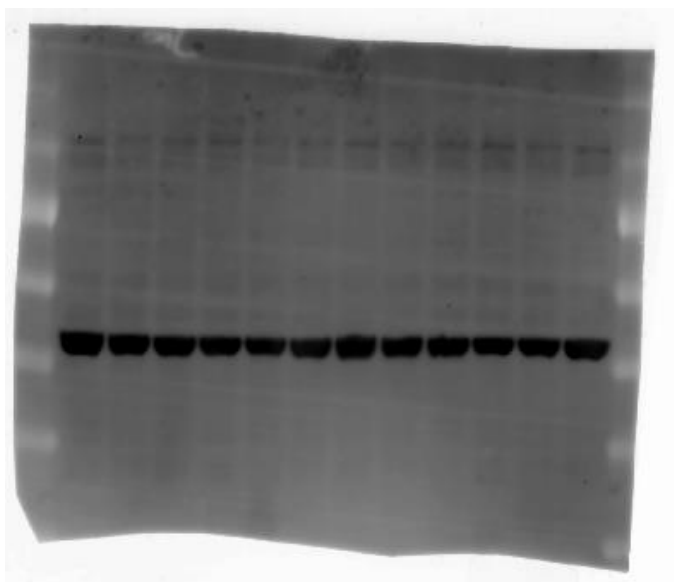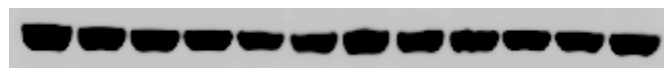

Figuer7 K

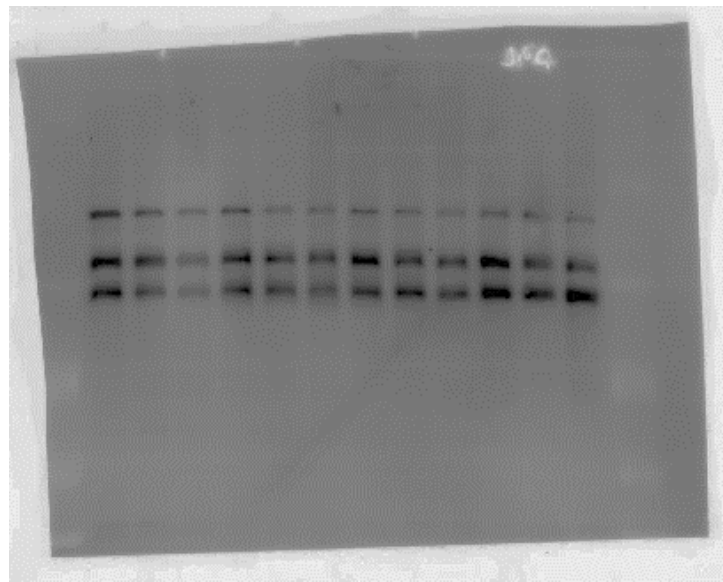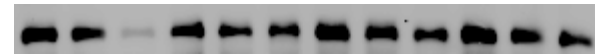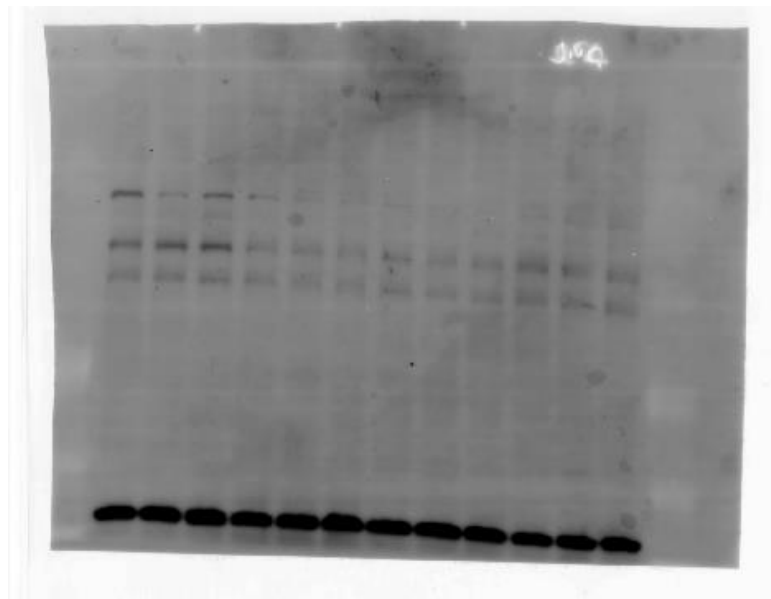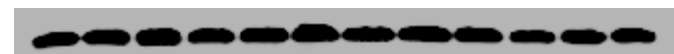

Figuer7 L

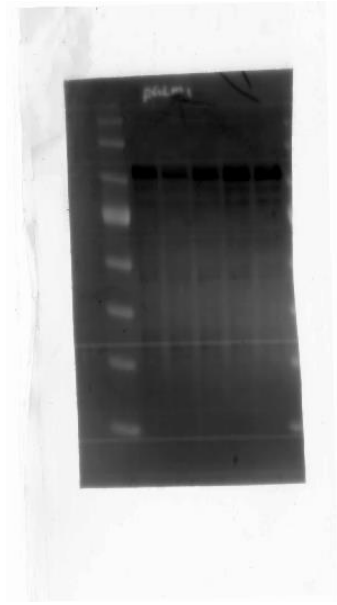

SP1

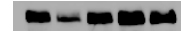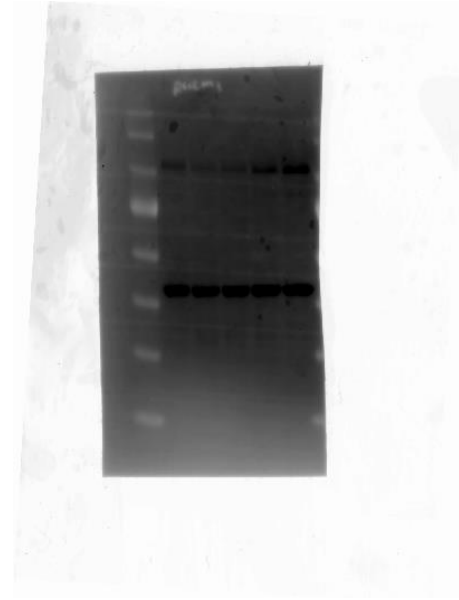

ACTIN

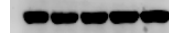

Figuer7 M

RKO

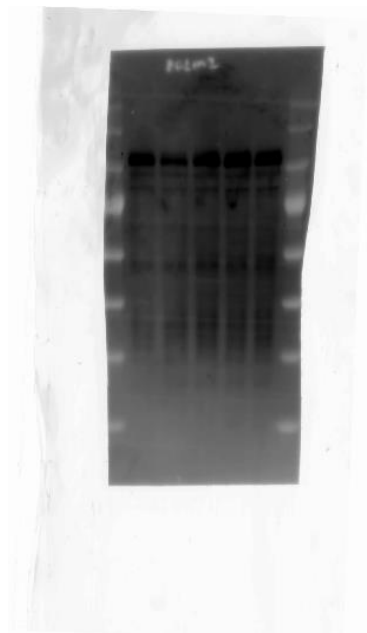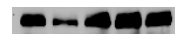

SP1

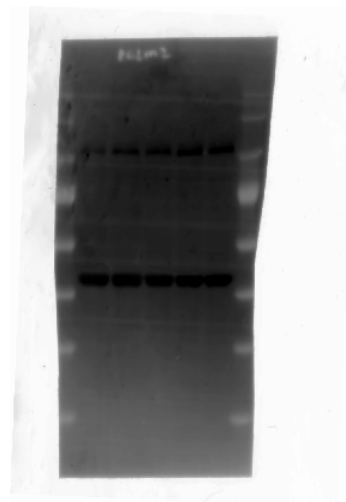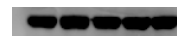

ACTIN
